# Supplementary material for: Adjustment of the bioresistivity by electron irradiation: self-assembled monolayers of oligo(ethyleneglycol)-terminated alkanethiols with embedded cleavable group
Source: Royal Society of Chemistry journal article supplement (doi:10.1039/b915036f), 2009-11-17
Supplement: b915036f.pdf [file b915036f.pdf]

Supporting Information to

## Adjustment of the Bioresistivity by Electron Irradiation: Self-Assembled Monolayers of Oligo(ethyleneglycol)-Terminated Alkanethiols with Imbedded Cleavable Group

Simone Krakert,<sup>1</sup> Nirmalya Ballav,<sup>2</sup> Michael Zharnikov,<sup>\*,2</sup> Andreas Terfort<sup>\*,3</sup>

### Preparation of the OEG-sulfonethiols EG3SO2 and EG6SO2

With the exception of the final products, for which the same acronyms as in the manuscript are used, the compounds are distinguished in the following, using a shortened nomenclature. Me stands for a CH<sub>3</sub> group, EG for an OCH<sub>2</sub>CH<sub>2</sub> unit and Un signifies a linear C<sub>11</sub> chain.

All reactions were carried out under nitrogen, if not otherwise stated.

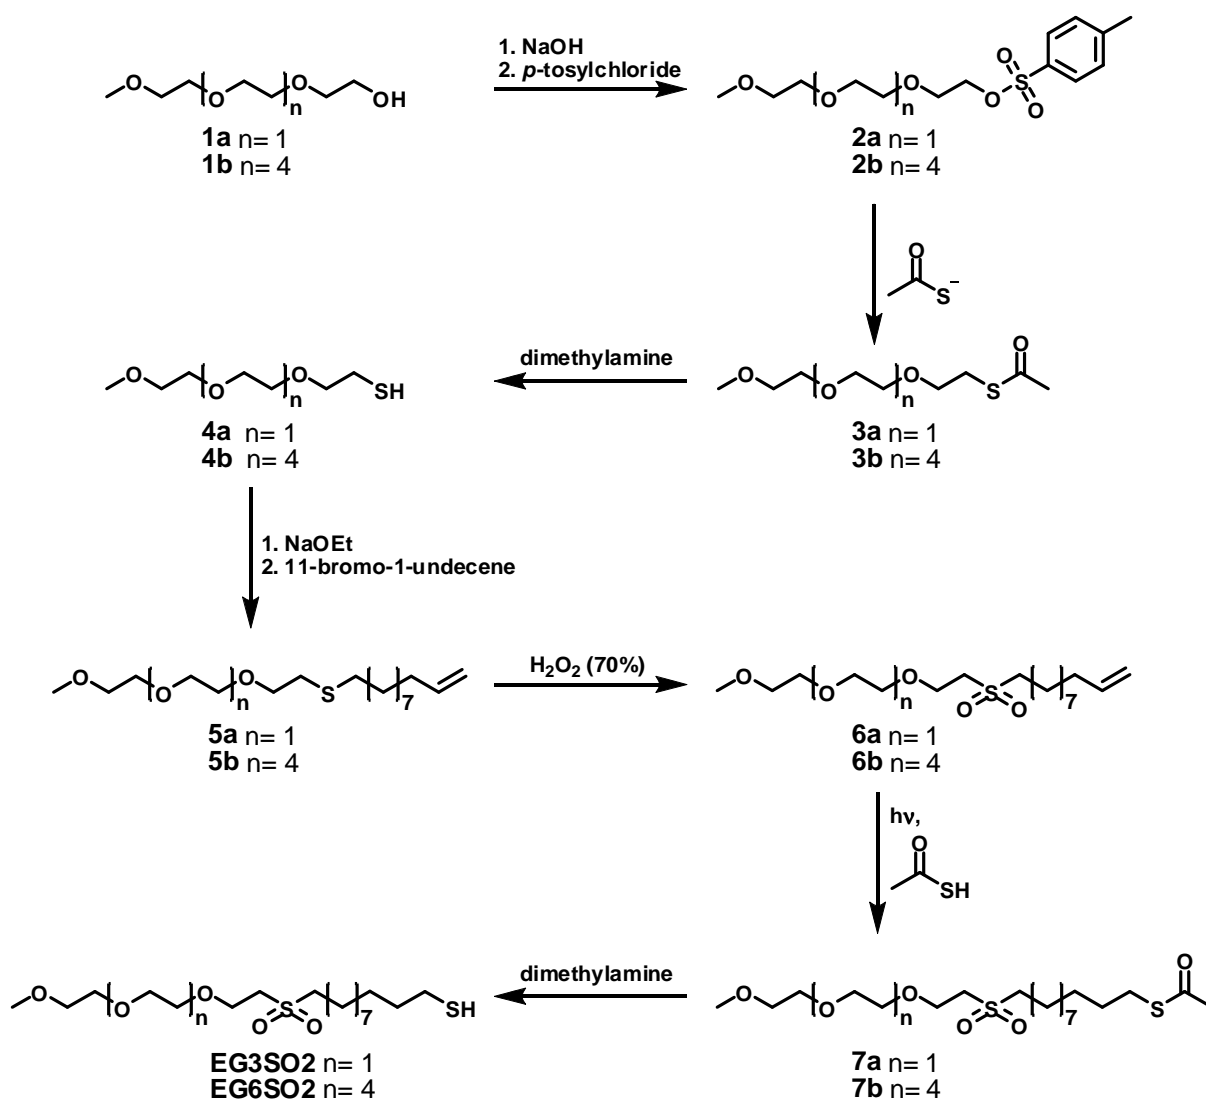

### Preparation of MeEG<sub>n</sub>OTos **2a** (n = 3), **2b** (n = 6)

The compounds **2a** and **2b** were synthesized by conversion of the alcohol function of triethylene glycol monomethyl ether **1a** and hexaethylene glycol monomethyl ether **1b** into the better leaving group tosylate according to Refs 1-3.

MeEG<sub>3</sub>OTos **2a**; 2-[2-(2-methoxyethoxy)ethoxy]ethyl 4-methylbenzenesulfonate

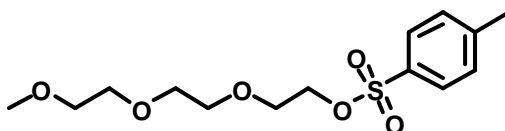

**Yield:** 17.62 g (55 mmol, 91 %), colourless oil.

**IR**  $\nu_{\max}$  (KBr)/ $\text{cm}^{-1}$  2868 ( $\nu_{(-\text{CH}_2)}$ ), 1598 ( $\nu_{(\text{C}-\text{C}_{\text{ar}})}$ ), 1453 ( $\delta_{(-\text{CH}_2)}$ ,  $\delta_{(-\text{CH}_3)}$ ), 1356 ( $\nu_{(-\text{RSO}_2\text{R}-)}$ ), 1292 ( $\nu_{(-\text{C}-\text{O}-\text{C}-)}$ ), 1250 ( $\nu_{(-\text{C}-\text{O}-\text{C}-)}$ ), 1189 ( $\nu_{(-\text{C}-\text{O}-\text{C}-)}$ ), 1177 ( $\nu_{(-\text{C}-\text{O}-\text{C}-)}$ ), 1098 ( $\nu_{(-\text{C}-\text{O}-\text{C}-)}$ ), 1018 ( $\delta_{(-\text{C}-\text{H})_{\text{ar}}}$ ), 923 ( $\delta_{(-\text{C}-\text{H})_{\text{ar}}}$ ).

**<sup>1</sup>H-NMR** (500 MHz, CDCl<sub>3</sub>),  $\delta$  [ppm]: 7.76 (d,  $^3J_{\text{HH}} = 8.3$  Hz, 2H, H<sub>2</sub>), 7.32 (d,  $^3J_{\text{HH}} = 8.0$  Hz, 2H, H<sub>3</sub>), 4.14 (t,  $^3J_{\text{HH}} = 4.8$  Hz, 2H, CH<sub>3</sub>OCH<sub>2</sub>CH<sub>2</sub>OCH<sub>2</sub>CH<sub>2</sub>OCH<sub>2</sub>CH<sub>2</sub>OTos), 3.67 (t,  $^3J_{\text{HH}} = 4.9$  Hz, 2H, CH<sub>3</sub>OCH<sub>2</sub>CH<sub>2</sub>OCH<sub>2</sub>CH<sub>2</sub>OCH<sub>2</sub>CH<sub>2</sub>OTos), 3.63-3.53 (m, 6H, CH<sub>3</sub>OCH<sub>2</sub>CH<sub>2</sub>OCH<sub>2</sub>CH<sub>2</sub>OCH<sub>2</sub>CH<sub>2</sub>OTos), 3.53-3.48 (m, 2H, CH<sub>3</sub>OCH<sub>2</sub>CH<sub>2</sub>OCH<sub>2</sub>CH<sub>2</sub>OCH<sub>2</sub>CH<sub>2</sub>OTos), 3.35 (s, 3H, CH<sub>3</sub>OCH<sub>2</sub>CH<sub>2</sub>OCH<sub>2</sub>CH<sub>2</sub>OCH<sub>2</sub>CH<sub>2</sub>OTos), 2.43 (s, 3H, TosCH<sub>3</sub>).

**<sup>13</sup>C-NMR** (125 MHz, CDCl<sub>3</sub>),  $\delta$  [ppm]: 144.72 (C<sub>4</sub>), 132.98 (C<sub>1</sub>), 129.74 (C<sub>3</sub>), 127.88 (C<sub>2</sub>), 71.82 (CH<sub>3</sub>OCH<sub>2</sub>CH<sub>2</sub>OCH<sub>2</sub>CH<sub>2</sub>OCH<sub>2</sub>CH<sub>2</sub>OTos), 70.65 (CH<sub>3</sub>OCH<sub>2</sub>CH<sub>2</sub>OCH<sub>2</sub>CH<sub>2</sub>OCH<sub>2</sub>CH<sub>2</sub>OTos), 70.45 (CH<sub>3</sub>OCH<sub>2</sub>CH<sub>2</sub>OCH<sub>2</sub>CH<sub>2</sub>OCH<sub>2</sub>CH<sub>2</sub>OTos), 69.16 (CH<sub>3</sub>OCH<sub>2</sub>CH<sub>2</sub>OCH<sub>2</sub>CH<sub>2</sub>OCH<sub>2</sub>CH<sub>2</sub>OTos), 68.59 (CH<sub>3</sub>OCH<sub>2</sub>CH<sub>2</sub>OCH<sub>2</sub>CH<sub>2</sub>OCH<sub>2</sub>CH<sub>2</sub>OTos), 58.91 (CH<sub>3</sub>OCH<sub>2</sub>CH<sub>2</sub>OCH<sub>2</sub>CH<sub>2</sub>OCH<sub>2</sub>CH<sub>2</sub>OTos), 21.53 (TosCH<sub>3</sub>).

**HRMS (ESI, m/z):** [M + Na]<sup>+</sup> calcd for C<sub>14</sub>H<sub>22</sub>NaO<sub>6</sub>S, 341.1035; found, 341.1029.

Anal. calcd for C<sub>14</sub>H<sub>22</sub>O<sub>6</sub>S: C 52.81, H 6.96, S 10.07; found: C 52.45, H 7.05, S 9.90.

MeEG<sub>6</sub>OTos **2b**

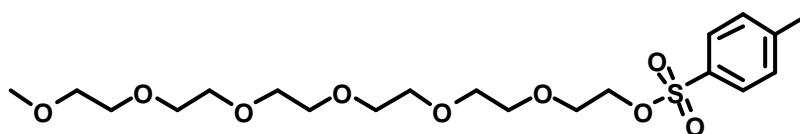

**Yield:** 10.7 g (24 mmol, 85 %), colourless liquid.

**<sup>1</sup>H-NMR** (300 MHz, CDCl<sub>3</sub>),  $\delta$  [ppm]: 7.79 (d,  $^3J_{\text{HH}} = 8.3$  Hz, 2H, H<sub>2</sub>), 7.34 (d,  $^3J_{\text{HH}} = 8.0$  Hz, 2H, H<sub>3</sub>), 4.20-4.10 (m, 2H, CH<sub>3</sub>OCH<sub>2</sub>CH<sub>2</sub>(OCH<sub>2</sub>CH<sub>2</sub>)<sub>4</sub>OCH<sub>2</sub>CH<sub>2</sub>OTos), 3.90-3.42 (m, 22H, CH<sub>3</sub>OCH<sub>2</sub>CH<sub>2</sub>(OCH<sub>2</sub>CH<sub>2</sub>)<sub>4</sub>OCH<sub>2</sub>CH<sub>2</sub>OTos), 3.37 (s, 3H, CH<sub>3</sub>OCH<sub>2</sub>CH<sub>2</sub>(OCH<sub>2</sub>CH<sub>2</sub>)<sub>4</sub>OCH<sub>2</sub>CH<sub>2</sub>OTos), 2.44 (s, 3H, TosCH<sub>3</sub>).

**Preparation of thioacetates MeEG<sub>n</sub>SAc **3a** (n = 3), **3b** (n = 6)<sup>4,5</sup>**

MeEG<sub>3</sub>SAc **3a**; Typical Procedure

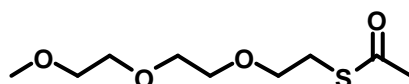

To a solution of potassium *tert*-butoxide (12.4 g, 110 mmol) in dry DMF (50 mL) thioacetic acid (16.9 g, 220 mmol) was added. The mixture was cooled with an ice bath. Then MeEG<sub>3</sub>OTos **2a** (17.6 g, 55 mmol) dissolved in dry DMF (30 mL) was added. The mixture was stirred at room temperature for 24 h. DMF and thioacetic acid were removed *in vacuo*. The residue dissolved in water and extracted with dichloromethane. The organic phase was evaporated *in vacuo*. For purification the residue was titrated twice with water for 15 minutes followed by decantation. The residue was further purified by chromatography on silica gel using dichloromethane/ ethanol (1% → 2% → 5%) as eluent to yield MeEG<sub>3</sub>SAC **3a** as a brown-red oil (7.8 g, 35 mmol, 64 % yield).

**Yield:** 7.8 g (35 mmol, 64 %), brown-red oil.

**IR**  $\nu_{\max}$  (KBr)/ $\text{cm}^{-1}$  2874 ( $\nu_{(-\text{CH}_2)}$ ), 1692 ( $\nu_{(\text{C}=\text{O})}$ ), 1455 ( $\delta_{(-\text{CH}_2)}$ ,  $\delta_{(-\text{CH}_3)}$ ), 1354 ( $\delta_{(-\text{CH}_3)}$ ), 1292 ( $\nu_{(-\text{C}-\text{O}-\text{C}-)}$ ), 1246 ( $\nu_{(-\text{C}-\text{O}-\text{C}-)}$ ), 1199 ( $\nu_{(-\text{C}-\text{O}-\text{C}-)}$ ), 1109 ( $\nu_{(-\text{C}-\text{O}-\text{C}-)}$ ).

**<sup>1</sup>H-NMR** (500 MHz, CDCl<sub>3</sub>),  $\delta$  [ppm]: 3.67-3.61 (m, 6H, CH<sub>3</sub>OCH<sub>2</sub>CH<sub>2</sub>OCH<sub>2</sub>CH<sub>2</sub>OCH<sub>2</sub>CH<sub>2</sub>SCOCH<sub>3</sub>), 3.59 (t, <sup>3</sup>J<sub>HH</sub> = 6.5 Hz, 2H, CH<sub>3</sub>OCH<sub>2</sub>CH<sub>2</sub>OCH<sub>2</sub>CH<sub>2</sub>OCH<sub>2</sub>CH<sub>2</sub>SCOCH<sub>3</sub>), 3.56-3.51 (m, 2H, CH<sub>3</sub>OCH<sub>2</sub>CH<sub>2</sub>OCH<sub>2</sub>CH<sub>2</sub>OCH<sub>2</sub>CH<sub>2</sub>SCOCH<sub>3</sub>), 3.37 (s, 3H, CH<sub>3</sub>OCH<sub>2</sub>CH<sub>2</sub>OCH<sub>2</sub>CH<sub>2</sub>OCH<sub>2</sub>CH<sub>2</sub>SCOCH<sub>3</sub>), 3.08 (t, <sup>3</sup>J<sub>HH</sub> = 6.5 Hz, 2H, CH<sub>3</sub>OCH<sub>2</sub>CH<sub>2</sub>OCH<sub>2</sub>CH<sub>2</sub>OCH<sub>2</sub>CH<sub>2</sub>SCOCH<sub>3</sub>), 2.32 (s, 3H, CH<sub>3</sub>OCH<sub>2</sub>CH<sub>2</sub>OCH<sub>2</sub>CH<sub>2</sub>OCH<sub>2</sub>CH<sub>2</sub>SCOCH<sub>3</sub>).

**<sup>13</sup>C-NMR** (125 MHz, CDCl<sub>3</sub>),  $\delta$  [ppm]: 195.44 (CH<sub>3</sub>OCH<sub>2</sub>CH<sub>2</sub>OCH<sub>2</sub>CH<sub>2</sub>OCH<sub>2</sub>CH<sub>2</sub>SCOCH<sub>3</sub>), 71.90 (CH<sub>3</sub>OCH<sub>2</sub>CH<sub>2</sub>OCH<sub>2</sub>CH<sub>2</sub>OCH<sub>2</sub>CH<sub>2</sub>SCOCH<sub>3</sub>), 70.53, 70.28 (CH<sub>3</sub>OCH<sub>2</sub>CH<sub>2</sub>OCH<sub>2</sub>CH<sub>2</sub>OCH<sub>2</sub>CH<sub>2</sub>SCOCH<sub>3</sub>), 69.72 (CH<sub>3</sub>OCH<sub>2</sub>CH<sub>2</sub>OCH<sub>2</sub>CH<sub>2</sub>OCH<sub>2</sub>CH<sub>2</sub>SCOCH<sub>3</sub>), 58.98 (CH<sub>3</sub>OCH<sub>2</sub>CH<sub>2</sub>OCH<sub>2</sub>CH<sub>2</sub>OCH<sub>2</sub>CH<sub>2</sub>SCOCH<sub>3</sub>), 30.49 (CH<sub>3</sub>OCH<sub>2</sub>CH<sub>2</sub>OCH<sub>2</sub>CH<sub>2</sub>OCH<sub>2</sub>CH<sub>2</sub>SCOCH<sub>3</sub>), 28.80 (CH<sub>3</sub>OCH<sub>2</sub>CH<sub>2</sub>OCH<sub>2</sub>CH<sub>2</sub>OCH<sub>2</sub>CH<sub>2</sub>SCOCH<sub>3</sub>).

**HRMS (ESI, m/z):** [M + Na]<sup>+</sup> calcd for C<sub>9</sub>H<sub>18</sub>NaO<sub>4</sub>S, 245.0823; found, 245.0818.

### MeEG<sub>6</sub>SAC **3b**

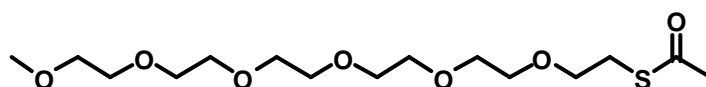

Similar to **2a**, MeEG<sub>6</sub>OTos **2b** (9.4 g, 20 mmol) was converted to MeEG<sub>6</sub>SAC **3b**. After purification by chromatography on silica gel using dichloromethane/ ethanol (1% → 2% → 5%) as eluent, a brown-red oil (6.3 g, 18 mmol, 88 % yield) was obtained.

**Yield:** 6.3 g (18 mmol, 88 %), brown-red liquid.

**IR**  $\nu_{\max}$  (KBr)/ $\text{cm}^{-1}$  2872 ( $\nu_{(-\text{CH}_2)}$ ), 1693 ( $\nu_{(\text{C}=\text{O})}$ ), 1457 ( $\delta_{(-\text{CH}_2)}$ ,  $\delta_{(-\text{CH}_3)}$ ), 1354 ( $\delta_{(-\text{CH}_3)}$ ), 1296 ( $\nu_{(-\text{C}-\text{O}-\text{C}-)}$ ), 1249 ( $\nu_{(-\text{C}-\text{O}-\text{C}-)}$ ), 1199 ( $\nu_{(-\text{C}-\text{O}-\text{C}-)}$ ), 1111 ( $\nu_{(-\text{C}-\text{O}-\text{C}-)}$ ).

**<sup>1</sup>H-NMR** (400 MHz, CDCl<sub>3</sub>),  $\delta$  [ppm]: 3.68-3.50 (m, 20H, CH<sub>3</sub>OCH<sub>2</sub>CH<sub>2</sub>(OCH<sub>2</sub>CH<sub>2</sub>)<sub>4</sub>OCH<sub>2</sub>CH<sub>2</sub>SCOCH<sub>3</sub>), 3.50-3.43 (m, 2H, CH<sub>3</sub>OCH<sub>2</sub>CH<sub>2</sub>(OCH<sub>2</sub>CH<sub>2</sub>)<sub>4</sub>OCH<sub>2</sub>CH<sub>2</sub>SCOCH<sub>3</sub>), 3.31 (s, 3H, CH<sub>3</sub>OCH<sub>2</sub>CH<sub>2</sub>(OCH<sub>2</sub>CH<sub>2</sub>)<sub>4</sub>OCH<sub>2</sub>CH<sub>2</sub>SCOCH<sub>3</sub>), 3.02 (t, <sup>3</sup>J<sub>HH</sub> = 6.5 Hz, 2H, CH<sub>3</sub>OCH<sub>2</sub>CH<sub>2</sub>(OCH<sub>2</sub>CH<sub>2</sub>)<sub>4</sub>OCH<sub>2</sub>CH<sub>2</sub>SCOCH<sub>3</sub>), 2.26 (s, 3H, CH<sub>3</sub>OCH<sub>2</sub>CH<sub>2</sub>(OCH<sub>2</sub>CH<sub>2</sub>)<sub>4</sub>OCH<sub>2</sub>CH<sub>2</sub>SCOCH<sub>3</sub>).

**<sup>13</sup>C-NMR** (100 MHz, CDCl<sub>3</sub>),  $\delta$  [ppm]:

195.19 (CH<sub>3</sub>OCH<sub>2</sub>CH<sub>2</sub>(OCH<sub>2</sub>CH<sub>2</sub>)<sub>4</sub>OCH<sub>2</sub>CH<sub>2</sub>SCOCH<sub>3</sub>),  
71.71 (CH<sub>3</sub>OCH<sub>2</sub>CH<sub>2</sub>(OCH<sub>2</sub>CH<sub>2</sub>)<sub>4</sub>OCH<sub>2</sub>CH<sub>2</sub>SCOCH<sub>3</sub>),  
70.44, 70.38, 70.31 (CH<sub>3</sub>OCH<sub>2</sub>CH<sub>2</sub>(OCH<sub>2</sub>CH<sub>2</sub>)<sub>4</sub>OCH<sub>2</sub>CH<sub>2</sub>SCOCH<sub>3</sub>),  
68.54 (CH<sub>3</sub>OCH<sub>2</sub>CH<sub>2</sub>(OCH<sub>2</sub>CH<sub>2</sub>)<sub>4</sub>OCH<sub>2</sub>CH<sub>2</sub>SCOCH<sub>3</sub>),  
58.80 (CH<sub>3</sub>OCH<sub>2</sub>CH<sub>2</sub>(OCH<sub>2</sub>CH<sub>2</sub>)<sub>4</sub>OCH<sub>2</sub>CH<sub>2</sub>SCOCH<sub>3</sub>),  
30.34 (CH<sub>3</sub>OCH<sub>2</sub>CH<sub>2</sub>(OCH<sub>2</sub>CH<sub>2</sub>)<sub>4</sub>OCH<sub>2</sub>CH<sub>2</sub>SCOCH<sub>3</sub>),  
28.63 (CH<sub>3</sub>OCH<sub>2</sub>CH<sub>2</sub>(OCH<sub>2</sub>CH<sub>2</sub>)<sub>4</sub>OCH<sub>2</sub>CH<sub>2</sub>SCOCH<sub>3</sub>).

**HRMS (ESI, m/z):** [M + Na]<sup>+</sup> calcd for C<sub>15</sub>H<sub>30</sub>NaO<sub>7</sub>S, 377.1610; found, 377.1604.

### Preparation of MeEG<sub>n</sub>SH **4a** (n = 3), **4b** (n = 6)

MeEG<sub>3</sub>SH **4a**; Typical Procedure

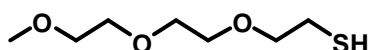

To a solution of MeEG<sub>3</sub>SAc **3a** (7.8 g, 35 mmol) in dry methanol (40 mL) was added neat dimethylamine (6.9 g, 154 mmol). The solution was stirred at room temperature for 24 h followed by acidification with degassed acetic acid. The solvent was removed *in vacuo* and the residue portioned between dichloromethane and water. The organic phase was evaporated to dryness and the residue was further purified by chromatography on silica gel using dichloromethane/ ethylacetate 9:1 -> 1:1 as eluent to yield MeEG<sub>3</sub>SH **4a** as a slight yellow oil (5.5 g, 30 mmol, 87 % yield).

**Yield:** 5.5 g (30 mmol, 87 %), slight yellow oil.

**IR**  $\nu_{\max}$  (KBr)/cm<sup>-1</sup> 2873 ( $\nu_{(-CH_2)}$ ), 2556 ( $\nu_{(S-H)}$ ), 1455 ( $\delta_{(-CH_2)}$ ,  $\delta_{(-CH_3)}$ ), 1351 ( $\delta_{(-CH_3)}$ ), 1294 ( $\nu_{(-C-O-C-)}$ ), 1246 ( $\nu_{(-C-O-C-)}$ ), 1199 ( $\nu_{(-C-O-C-)}$ ), 1108 ( $\nu_{(-C-O-C-)}$ ).

**<sup>1</sup>H-NMR** (500 MHz, CDCl<sub>3</sub>),  $\delta$  [ppm]: 3.70-3.59 (m, 8H, CH<sub>3</sub>OCH<sub>2</sub>CH<sub>2</sub>OCH<sub>2</sub>CH<sub>2</sub>OCH<sub>2</sub>CH<sub>2</sub>SH),  
3.59-3.50 (m, 2H, CH<sub>3</sub>OCH<sub>2</sub>CH<sub>2</sub>OCH<sub>2</sub>CH<sub>2</sub>OCH<sub>2</sub>CH<sub>2</sub>SH),  
3.37 (s, 3H, CH<sub>3</sub>OCH<sub>2</sub>CH<sub>2</sub>OCH<sub>2</sub>CH<sub>2</sub>OCH<sub>2</sub>CH<sub>2</sub>SH),  
2.69 (q, <sup>3</sup>J<sub>HH</sub> = 7.0 Hz, 2H, CH<sub>3</sub>OCH<sub>2</sub>CH<sub>2</sub>OCH<sub>2</sub>CH<sub>2</sub>OCH<sub>2</sub>CH<sub>2</sub>SH),  
1.57 (t, <sup>3</sup>J<sub>HH</sub> = 8.2 Hz, 1H, CH<sub>3</sub>OCH<sub>2</sub>CH<sub>2</sub>OCH<sub>2</sub>CH<sub>2</sub>OCH<sub>2</sub>CH<sub>2</sub>SH).

**<sup>13</sup>C-NMR** (125 MHz, CDCl<sub>3</sub>),  $\delta$  [ppm]: 72.87 (CH<sub>3</sub>OCH<sub>2</sub>CH<sub>2</sub>OCH<sub>2</sub>CH<sub>2</sub>OCH<sub>2</sub>CH<sub>2</sub>SH),  
71.92 (CH<sub>3</sub>OCH<sub>2</sub>CH<sub>2</sub>OCH<sub>2</sub>CH<sub>2</sub>OCH<sub>2</sub>CH<sub>2</sub>SH),  
70.55, 70.21 (CH<sub>3</sub>OCH<sub>2</sub>CH<sub>2</sub>OCH<sub>2</sub>CH<sub>2</sub>OCH<sub>2</sub>CH<sub>2</sub>SH),  
59.00 (CH<sub>3</sub>OCH<sub>2</sub>CH<sub>2</sub>OCH<sub>2</sub>CH<sub>2</sub>OCH<sub>2</sub>CH<sub>2</sub>SH),  
24.23 (CH<sub>3</sub>OCH<sub>2</sub>CH<sub>2</sub>OCH<sub>2</sub>CH<sub>2</sub>OCH<sub>2</sub>CH<sub>2</sub>SH).

**HRMS (ESI, m/z):** [M + Na]<sup>+</sup> calcd for C<sub>7</sub>H<sub>16</sub>NaO<sub>3</sub>S, 203.0718; found, 203.0713.

MeEG<sub>6</sub>SH **4b**

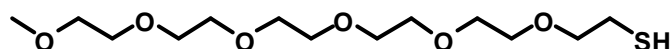

Similarly as described for **4a**, MeEG<sub>6</sub>SAc **3b** (3.0 g, 8.5 mmol) was converted to yield MeEG<sub>6</sub>SH **4b** (2.5 g, 8.0 mmol, 94 %). The crude product was used without chromatography.

**Yield:** 2.5 g (8.0 mmol, 94 %), light yellow oil.

**<sup>1</sup>H-NMR** (300 MHz, CDCl<sub>3</sub>),  $\delta$  [ppm]: 3.70-3.57 (m, 20H, CH<sub>3</sub>OCH<sub>2</sub>CH<sub>2</sub>(OCH<sub>2</sub>CH<sub>2</sub>)<sub>4</sub>OCH<sub>2</sub>CH<sub>2</sub>SH),  
3.57-3.51 (m, 2H, CH<sub>3</sub>OCH<sub>2</sub>CH<sub>2</sub>(OCH<sub>2</sub>CH<sub>2</sub>)<sub>4</sub>OCH<sub>2</sub>CH<sub>2</sub>SH),  
3.38 (s, 3H, CH<sub>3</sub>OCH<sub>2</sub>CH<sub>2</sub>(OCH<sub>2</sub>CH<sub>2</sub>)<sub>4</sub>OCH<sub>2</sub>CH<sub>2</sub>SH),  
2.69 (q, <sup>3</sup>J<sub>HH</sub> = 7.0 Hz, 2H, CH<sub>3</sub>OCH<sub>2</sub>CH<sub>2</sub>(OCH<sub>2</sub>CH<sub>2</sub>)<sub>4</sub>OCH<sub>2</sub>CH<sub>2</sub>SH),

1.59 (t,  $^3J_{HH} = 8.2$  Hz, 1H,  $\text{CH}_3\text{OCH}_2\text{CH}_2(\text{OCH}_2\text{CH}_2)_4\text{OCH}_2\text{CH}_2\text{SH}$ ).

### Undecenylolation of $\text{MeEG}_n\text{SH}$ **4a,b** to $\text{MeEG}_n\text{SUn}$ **5a** ( $n = 3$ ), **5b** ( $n = 6$ )

$\text{MeEG}_3\text{SUn}$  **5a**; Typical Procedure<sup>1,6</sup>

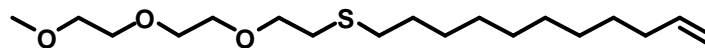

To a solution of sodium (0.27 g, 12 mmol) in dry ethanol (30 mL), a solution of  $\text{MeEG}_3\text{SH}$  **4a** (2.1 g, 12 mmol) in dry ethanol (30 mL) was added. The mixture was stirred at room temperature for 20 min before 11-bromo-1-undecen (2.7 g, 12 mmol) was added. The stirring was continued at room temperature for 24 h before the mixture was acidified with degassed acetic acid. Then the solvent was removed *in vacuo* and the residue extracted with dichloromethane and water. The organic phase was evaporated to dryness to yield  $\text{MeEG}_3\text{SUn}$  **5a** (3.8 g, 11.4 mmol, 99 %), which was used without further purification.

**Yield:** 3.8 g (11.4 mmol, 99 %), light brown-yellow oil.

**IR**  $\nu_{\text{max}}$  (KBr)/ $\text{cm}^{-1}$  3075 ( $\nu_{\text{C}=\text{H}_2}$ ), 2925 ( $\nu_{\text{C}-\text{H}_3}, \nu_{\text{C}-\text{H}_2}$ ), 2854 ( $\nu_{\text{C}-\text{H}_2}$ ), 1640 ( $\nu_{\text{C}=\text{C}}$ ), 1462 ( $\delta_{\text{C}-\text{H}_2}, \delta_{\text{C}-\text{H}_3}$ ), 1351 ( $\delta_{\text{C}-\text{H}_3}$ ), 1291 ( $\nu_{\text{C}-\text{O}-\text{C}}$ ), 1246 ( $\nu_{\text{C}-\text{O}-\text{C}}$ ), 1200 ( $\nu_{\text{C}-\text{O}-\text{C}}$ ), 1111 ( $\nu_{\text{C}-\text{O}-\text{C}}$ ), 910 ( $\delta_{\text{C}=\text{H}}$ ).

**$^1\text{H-NMR}$**  (500 MHz,  $\text{CDCl}_3$ ),  $\delta$  [ppm]: 5.87-5.73 (m, 1H,  $\text{CH}_3\text{OCH}_2\text{CH}_2\text{OCH}_2\text{CH}_2\text{OCH}_2\text{CH}_2\text{SCH}_2\text{CH}_2\text{CH}_2(\text{CH}_2)_4\text{CH}_2\text{CH}_2\text{CH}=\text{CH}_2$ ), 5.04-4.86 (m, 2H,  $\text{CH}_3\text{OCH}_2\text{CH}_2\text{OCH}_2\text{CH}_2\text{OCH}_2\text{CH}_2\text{SCH}_2\text{CH}_2\text{CH}_2(\text{CH}_2)_4\text{CH}_2\text{CH}_2\text{CH}=\text{CH}_2$ ), 3.69-3.58 (m, 8H,  $\text{CH}_3\text{OCH}_2\text{CH}_2\text{OCH}_2\text{CH}_2\text{OCH}_2\text{CH}_2\text{SCH}_2\text{CH}_2\text{CH}_2(\text{CH}_2)_4\text{CH}_2\text{CH}_2\text{CH}=\text{CH}_2$ ), 3.57-3.51 (m, 2H,  $\text{CH}_3\text{OCH}_2\text{CH}_2\text{OCH}_2\text{CH}_2\text{OCH}_2\text{CH}_2\text{SCH}_2\text{CH}_2\text{CH}_2(\text{CH}_2)_4\text{CH}_2\text{CH}_2\text{CH}=\text{CH}_2$ ), 3.37 (s, 3H,  $\text{CH}_3\text{OCH}_2\text{CH}_2\text{OCH}_2\text{CH}_2\text{OCH}_2\text{CH}_2\text{SCH}_2\text{CH}_2\text{CH}_2(\text{CH}_2)_4\text{CH}_2\text{CH}_2\text{CH}=\text{CH}_2$ ), 2.69 (t,  $^3J_{HH} = 7.1$  Hz, 2H,  $\text{CH}_3\text{OCH}_2\text{CH}_2\text{OCH}_2\text{CH}_2\text{OCH}_2\text{CH}_2\text{SCH}_2\text{CH}_2\text{CH}_2(\text{CH}_2)_4\text{CH}_2\text{CH}_2\text{CH}=\text{CH}_2$ ), 2.52 (t,  $^3J_{HH} = 7.4$  Hz, 2H,  $\text{CH}_3\text{OCH}_2\text{CH}_2\text{OCH}_2\text{CH}_2\text{OCH}_2\text{CH}_2\text{SCH}_2\text{CH}_2\text{CH}_2(\text{CH}_2)_4\text{CH}_2\text{CH}_2\text{CH}=\text{CH}_2$ ), 2.02 (q,  $^3J_{HH} = 7.1$  Hz, 2H,  $\text{CH}_3\text{OCH}_2\text{CH}_2\text{OCH}_2\text{CH}_2\text{OCH}_2\text{CH}_2\text{SCH}_2\text{CH}_2\text{CH}_2(\text{CH}_2)_4\text{CH}_2\text{CH}_2\text{CH}=\text{CH}_2$ ), 1.61-1.51 (m, 2H,  $\text{CH}_3\text{OCH}_2\text{CH}_2\text{OCH}_2\text{CH}_2\text{OCH}_2\text{CH}_2\text{SCH}_2\text{CH}_2\text{CH}_2(\text{CH}_2)_4\text{CH}_2\text{CH}_2\text{CH}=\text{CH}_2$ ), 1.42-1.31 (m, 2H,  $\text{CH}_3\text{OCH}_2\text{CH}_2\text{OCH}_2\text{CH}_2\text{OCH}_2\text{CH}_2\text{SCH}_2\text{CH}_2\text{CH}_2(\text{CH}_2)_4\text{CH}_2\text{CH}_2\text{CH}=\text{CH}_2$ ), 1.31-1.20 (m, 10H,  $\text{CH}_3\text{OCH}_2\text{CH}_2\text{OCH}_2\text{CH}_2\text{OCH}_2\text{CH}_2\text{SCH}_2\text{CH}_2\text{CH}_2(\text{CH}_2)_4\text{CH}_2\text{CH}_2\text{CH}=\text{CH}_2$ ).

**$^{13}\text{C-NMR}$**  (125 MHz,  $\text{CDCl}_3$ ),  $\delta$  [ppm]:

139.15 ( $\text{CH}_3\text{OCH}_2\text{CH}_2\text{OCH}_2\text{CH}_2\text{OCH}_2\text{CH}_2\text{SCH}_2\text{CH}_2\text{CH}_2(\text{CH}_2)_4\text{CH}_2\text{CH}_2\text{CH}=\text{CH}_2$ ),  
114.06 ( $\text{CH}_3\text{OCH}_2\text{CH}_2\text{OCH}_2\text{CH}_2\text{OCH}_2\text{CH}_2\text{SCH}_2\text{CH}_2\text{CH}_2(\text{CH}_2)_4\text{CH}_2\text{CH}_2\text{CH}=\text{CH}_2$ ),  
71.92 ( $\text{CH}_3\text{OCH}_2\text{CH}_2\text{OCH}_2\text{CH}_2\text{OCH}_2\text{CH}_2\text{SCH}_2\text{CH}_2\text{CH}_2(\text{CH}_2)_4\text{CH}_2\text{CH}_2\text{CH}=\text{CH}_2$ ),  
71.01, 70.60, 70.54, 70.27  
( $\text{CH}_3\text{OCH}_2\text{CH}_2\text{OCH}_2\text{CH}_2\text{OCH}_2\text{CH}_2\text{SCH}_2\text{CH}_2\text{CH}_2(\text{CH}_2)_4\text{CH}_2\text{CH}_2\text{CH}=\text{CH}_2$ ),  
58.98 ( $\text{CH}_3\text{OCH}_2\text{CH}_2\text{OCH}_2\text{CH}_2\text{OCH}_2\text{CH}_2\text{SCH}_2\text{CH}_2\text{CH}_2(\text{CH}_2)_4\text{CH}_2\text{CH}_2\text{CH}=\text{CH}_2$ ),  
33.74 ( $\text{CH}_3\text{OCH}_2\text{CH}_2\text{OCH}_2\text{CH}_2\text{OCH}_2\text{CH}_2\text{SCH}_2\text{CH}_2\text{CH}_2(\text{CH}_2)_4\text{CH}_2\text{CH}_2\text{CH}=\text{CH}_2$ ),  
32.55 ( $\text{CH}_3\text{OCH}_2\text{CH}_2\text{OCH}_2\text{CH}_2\text{OCH}_2\text{CH}_2\text{SCH}_2\text{CH}_2\text{CH}_2(\text{CH}_2)_4\text{CH}_2\text{CH}_2\text{CH}=\text{CH}_2$ ),  
31.35 ( $\text{CH}_3\text{OCH}_2\text{CH}_2\text{OCH}_2\text{CH}_2\text{OCH}_2\text{CH}_2\text{SCH}_2\text{CH}_2\text{CH}_2(\text{CH}_2)_4\text{CH}_2\text{CH}_2\text{CH}=\text{CH}_2$ ),  
29.77 ( $\text{CH}_3\text{OCH}_2\text{CH}_2\text{OCH}_2\text{CH}_2\text{OCH}_2\text{CH}_2\text{SCH}_2\text{CH}_2\text{CH}_2(\text{CH}_2)_4\text{CH}_2\text{CH}_2\text{CH}=\text{CH}_2$ ),  
29.41, 29.37, 29.18, 29.05, 28.87

( $\text{CH}_3\text{OCH}_2\text{CH}_2\text{OCH}_2\text{CH}_2\text{OCH}_2\text{CH}_2\text{SCH}_2\text{CH}_2\text{CH}_2(\text{CH}_2)_4\text{CH}_2\text{CH}_2\text{CH}=\text{CH}_2$ ),  
28.81 ( $\text{CH}_3\text{OCH}_2\text{CH}_2\text{OCH}_2\text{CH}_2\text{OCH}_2\text{CH}_2\text{SCH}_2\text{CH}_2\text{CH}_2(\text{CH}_2)_4\text{CH}_2\text{CH}_2\text{CH}=\text{CH}_2$ ).

**HRMS (ESI,  $m/z$ ):**  $[\text{M} + \text{Na}]^+$  calcd for  $\text{C}_{18}\text{H}_{36}\text{NaO}_3\text{S}$ , 355.2283; found 355.2277.

### MeEG<sub>6</sub>SUn **5b**

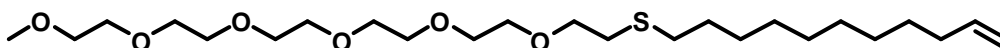

MeEG<sub>6</sub>SH **4b** (2.5 g, 8.0 mmol) was converted to MeEG<sub>6</sub>SUn **5b** (3.7 g, 7.9 mmol, 99 %) following the procedure given for **5a**. The crude product was used without further purification.

**Yield:** 3.7 g (7.9 mmol, 99 %), light brown-yellow oil.

**IR**  $\nu_{\max}$  (KBr)/ $\text{cm}^{-1}$  3075 ( $\nu_{\text{C}=\text{H}_2}$ ), 2925 ( $\nu_{\text{C}-\text{H}_3}$ ,  $\nu_{\text{C}-\text{H}_2}$ ), 2854 ( $\nu_{\text{C}-\text{H}_2}$ ), 1640 ( $\nu_{\text{C}=\text{C}}$ ), 1461 ( $\delta_{\text{C}-\text{H}_2}$ ,  $\delta_{\text{C}-\text{H}_3}$ ), 1350 ( $\delta_{\text{C}-\text{H}_3}$ ), 1293 ( $\nu_{\text{C}-\text{O}-\text{C}}$ ), 1249 ( $\nu_{\text{C}-\text{O}-\text{C}}$ ), 1199 ( $\nu_{\text{C}-\text{O}-\text{C}}$ ), 1112 ( $\nu_{\text{C}-\text{O}-\text{C}}$ ), 911 ( $\delta_{\text{C}=\text{H}}$ ).

**<sup>1</sup>H-NMR** (500 MHz, CDCl<sub>3</sub>),  $\delta$  [ppm]: 5.86-5.73 (m, 1H, CH<sub>3</sub>OCH<sub>2</sub>CH<sub>2</sub>(OCH<sub>2</sub>CH<sub>2</sub>)<sub>4</sub>OCH<sub>2</sub>CH<sub>2</sub>SCH<sub>2</sub>CH<sub>2</sub>CH<sub>2</sub>(CH<sub>2</sub>)<sub>4</sub>CH<sub>2</sub>CH<sub>2</sub>CH=CH<sub>2</sub>), 5.04-4.87 (m, 2H, CH<sub>3</sub>OCH<sub>2</sub>CH<sub>2</sub>(OCH<sub>2</sub>CH<sub>2</sub>)<sub>4</sub>OCH<sub>2</sub>CH<sub>2</sub>SCH<sub>2</sub>CH<sub>2</sub>CH<sub>2</sub>(CH<sub>2</sub>)<sub>4</sub>CH<sub>2</sub>CH<sub>2</sub>CH=CH<sub>2</sub>), 3.68-3.58 (m, 20H, CH<sub>3</sub>OCH<sub>2</sub>CH<sub>2</sub>(OCH<sub>2</sub>CH<sub>2</sub>)<sub>4</sub>OCH<sub>2</sub>CH<sub>2</sub>SCH<sub>2</sub>CH<sub>2</sub>CH<sub>2</sub>(CH<sub>2</sub>)<sub>4</sub>CH<sub>2</sub>CH<sub>2</sub>CH=CH<sub>2</sub>), 3.56-3.50 (m, 2H, CH<sub>3</sub>OCH<sub>2</sub>CH<sub>2</sub>(OCH<sub>2</sub>CH<sub>2</sub>)<sub>4</sub>OCH<sub>2</sub>CH<sub>2</sub>SCH<sub>2</sub>CH<sub>2</sub>CH<sub>2</sub>(CH<sub>2</sub>)<sub>4</sub>CH<sub>2</sub>CH<sub>2</sub>CH=CH<sub>2</sub>), 3.36 (s, 3H, CH<sub>3</sub>OCH<sub>2</sub>CH<sub>2</sub>(OCH<sub>2</sub>CH<sub>2</sub>)<sub>4</sub>OCH<sub>2</sub>CH<sub>2</sub>SCH<sub>2</sub>CH<sub>2</sub>CH<sub>2</sub>(CH<sub>2</sub>)<sub>4</sub>CH<sub>2</sub>CH<sub>2</sub>CH=CH<sub>2</sub>), 2.68 (t, <sup>3</sup>J<sub>HH</sub> = 7.1 Hz, 2H, CH<sub>3</sub>OCH<sub>2</sub>CH<sub>2</sub>(OCH<sub>2</sub>CH<sub>2</sub>)<sub>4</sub>OCH<sub>2</sub>CH<sub>2</sub>SCH<sub>2</sub>CH<sub>2</sub>CH<sub>2</sub>(CH<sub>2</sub>)<sub>4</sub>CH<sub>2</sub>CH<sub>2</sub>CH=CH<sub>2</sub>), 2.52 (t, <sup>3</sup>J<sub>HH</sub> = 7.4 Hz, 2H, CH<sub>3</sub>OCH<sub>2</sub>CH<sub>2</sub>(OCH<sub>2</sub>CH<sub>2</sub>)<sub>4</sub>OCH<sub>2</sub>CH<sub>2</sub>SCH<sub>2</sub>CH<sub>2</sub>CH<sub>2</sub>(CH<sub>2</sub>)<sub>4</sub>CH<sub>2</sub>CH<sub>2</sub>CH=CH<sub>2</sub>), 2.02 (q, <sup>3</sup>J<sub>HH</sub> = 7.1 Hz, 2H, CH<sub>3</sub>OCH<sub>2</sub>CH<sub>2</sub>(OCH<sub>2</sub>CH<sub>2</sub>)<sub>4</sub>OCH<sub>2</sub>CH<sub>2</sub>SCH<sub>2</sub>CH<sub>2</sub>CH<sub>2</sub>(CH<sub>2</sub>)<sub>4</sub>CH<sub>2</sub>CH<sub>2</sub>CH=CH<sub>2</sub>), 1.62-1.50 (m, 2H, CH<sub>3</sub>OCH<sub>2</sub>CH<sub>2</sub>(OCH<sub>2</sub>CH<sub>2</sub>)<sub>4</sub>OCH<sub>2</sub>CH<sub>2</sub>SCH<sub>2</sub>CH<sub>2</sub>CH<sub>2</sub>(CH<sub>2</sub>)<sub>4</sub>CH<sub>2</sub>CH<sub>2</sub>CH=CH<sub>2</sub>), 1.42-1.30 (m, 2H, CH<sub>3</sub>OCH<sub>2</sub>CH<sub>2</sub>(OCH<sub>2</sub>CH<sub>2</sub>)<sub>4</sub>OCH<sub>2</sub>CH<sub>2</sub>SCH<sub>2</sub>CH<sub>2</sub>CH<sub>2</sub>(CH<sub>2</sub>)<sub>4</sub>CH<sub>2</sub>CH<sub>2</sub>CH=CH<sub>2</sub>), 1.30-1.20 (m, 10H, CH<sub>3</sub>OCH<sub>2</sub>CH<sub>2</sub>(OCH<sub>2</sub>CH<sub>2</sub>)<sub>4</sub>OCH<sub>2</sub>CH<sub>2</sub>SCH<sub>2</sub>CH<sub>2</sub>CH<sub>2</sub>(CH<sub>2</sub>)<sub>4</sub>CH<sub>2</sub>CH<sub>2</sub>CH=CH<sub>2</sub>).

**<sup>13</sup>C-NMR** (125 MHz, CDCl<sub>3</sub>),  $\delta$  [ppm]: 139.13 (CH<sub>3</sub>OCH<sub>2</sub>CH<sub>2</sub>(OCH<sub>2</sub>CH<sub>2</sub>)<sub>4</sub>OCH<sub>2</sub>CH<sub>2</sub>SCH<sub>2</sub>CH<sub>2</sub>CH<sub>2</sub>(CH<sub>2</sub>)<sub>4</sub>CH<sub>2</sub>CH<sub>2</sub>CH=CH<sub>2</sub>), 114.06 (CH<sub>3</sub>OCH<sub>2</sub>CH<sub>2</sub>(OCH<sub>2</sub>CH<sub>2</sub>)<sub>4</sub>OCH<sub>2</sub>CH<sub>2</sub>SCH<sub>2</sub>CH<sub>2</sub>CH<sub>2</sub>(CH<sub>2</sub>)<sub>4</sub>CH<sub>2</sub>CH<sub>2</sub>CH=CH<sub>2</sub>), 71.90 (CH<sub>3</sub>OCH<sub>2</sub>CH<sub>2</sub>(OCH<sub>2</sub>CH<sub>2</sub>)<sub>4</sub>OCH<sub>2</sub>CH<sub>2</sub>SCH<sub>2</sub>CH<sub>2</sub>CH<sub>2</sub>(CH<sub>2</sub>)<sub>4</sub>CH<sub>2</sub>CH<sub>2</sub>CH=CH<sub>2</sub>), 70.98, 70.54, 70.47, 70.26 (CH<sub>3</sub>OCH<sub>2</sub>CH<sub>2</sub>(OCH<sub>2</sub>CH<sub>2</sub>)<sub>4</sub>OCH<sub>2</sub>CH<sub>2</sub>SCH<sub>2</sub>CH<sub>2</sub>CH<sub>2</sub>(CH<sub>2</sub>)<sub>4</sub>CH<sub>2</sub>CH<sub>2</sub>CH=CH<sub>2</sub>), 58.96 (CH<sub>3</sub>OCH<sub>2</sub>CH<sub>2</sub>(OCH<sub>2</sub>CH<sub>2</sub>)<sub>4</sub>OCH<sub>2</sub>CH<sub>2</sub>SCH<sub>2</sub>CH<sub>2</sub>CH<sub>2</sub>(CH<sub>2</sub>)<sub>4</sub>CH<sub>2</sub>CH<sub>2</sub>CH=CH<sub>2</sub>), 33.72 (CH<sub>3</sub>OCH<sub>2</sub>CH<sub>2</sub>(OCH<sub>2</sub>CH<sub>2</sub>)<sub>4</sub>OCH<sub>2</sub>CH<sub>2</sub>SCH<sub>2</sub>CH<sub>2</sub>CH<sub>2</sub>(CH<sub>2</sub>)<sub>4</sub>CH<sub>2</sub>CH<sub>2</sub>CH=CH<sub>2</sub>), 32.53 (CH<sub>3</sub>OCH<sub>2</sub>CH<sub>2</sub>(OCH<sub>2</sub>CH<sub>2</sub>)<sub>4</sub>OCH<sub>2</sub>CH<sub>2</sub>SCH<sub>2</sub>CH<sub>2</sub>CH<sub>2</sub>(CH<sub>2</sub>)<sub>4</sub>CH<sub>2</sub>CH<sub>2</sub>CH=CH<sub>2</sub>), 31.33 (CH<sub>3</sub>OCH<sub>2</sub>CH<sub>2</sub>(OCH<sub>2</sub>CH<sub>2</sub>)<sub>4</sub>OCH<sub>2</sub>CH<sub>2</sub>SCH<sub>2</sub>CH<sub>2</sub>CH<sub>2</sub>(CH<sub>2</sub>)<sub>4</sub>CH<sub>2</sub>CH<sub>2</sub>CH=CH<sub>2</sub>), 29.75 (CH<sub>3</sub>OCH<sub>2</sub>CH<sub>2</sub>(OCH<sub>2</sub>CH<sub>2</sub>)<sub>4</sub>OCH<sub>2</sub>CH<sub>2</sub>SCH<sub>2</sub>CH<sub>2</sub>CH<sub>2</sub>(CH<sub>2</sub>)<sub>4</sub>CH<sub>2</sub>CH<sub>2</sub>CH=CH<sub>2</sub>), 29.39, 29.35, 29.16, 29.03, 28.85 (CH<sub>3</sub>OCH<sub>2</sub>CH<sub>2</sub>(OCH<sub>2</sub>CH<sub>2</sub>)<sub>4</sub>OCH<sub>2</sub>CH<sub>2</sub>SCH<sub>2</sub>CH<sub>2</sub>CH<sub>2</sub>(CH<sub>2</sub>)<sub>4</sub>CH<sub>2</sub>CH<sub>2</sub>CH=CH<sub>2</sub>), 28.79 (CH<sub>3</sub>OCH<sub>2</sub>CH<sub>2</sub>(OCH<sub>2</sub>CH<sub>2</sub>)<sub>4</sub>OCH<sub>2</sub>CH<sub>2</sub>SCH<sub>2</sub>CH<sub>2</sub>CH<sub>2</sub>(CH<sub>2</sub>)<sub>4</sub>CH<sub>2</sub>CH<sub>2</sub>CH=CH<sub>2</sub>).

**HRMS (ESI, m/z):** [M + Na]<sup>+</sup> calcd for C<sub>24</sub>H<sub>48</sub>NaO<sub>6</sub>S, 487.3069; found, 487.3064.

### Oxidation of the sulfide function to generate the sulfones MeEG<sub>n</sub>SO<sub>2</sub>Un **6a** (n = 3), **6b** (n = 6)

#### MeEG<sub>3</sub>SO<sub>2</sub>Un **6a**

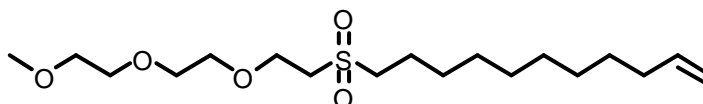

A solution of MeEG<sub>3</sub>SUn **5a** (3.3 g, 9.9 mmol) in THF (15 mL) was cooled to 0 °C before H<sub>2</sub>O<sub>2</sub> (70%, 0.78 mL) was slowly added. The mixture was stirred at room temperature for 24 h. The solvent was removed under reduced pressure to yield 3.8 g. The residue was purified by chromatography on Al<sub>2</sub>O<sub>3</sub> using dichloromethane/ethyl acetate (4:1->3:1->1:1) as eluent to yield MeEG<sub>3</sub>SO<sub>2</sub>Un **6a** as a colourless oil (1.4 g, 3.8 mmol, 39 % yield).

**Yield:** 1.4 g (3.8 mmol, 39 %), colourless oil.

**IR**  $\nu_{\max}$  (KBr)/cm<sup>-1</sup> 3076 ( $\nu_{(=\text{CH}_2)}$ ), 2924 ( $\nu_{(-\text{CH}_3)}$ ,  $\nu_{(-\text{CH}_2)}$ ), 2855 ( $\nu_{(-\text{CH}_2)}$ ), 1640 ( $\nu_{(\text{C}=\text{C})}$ ), 1463 ( $\delta_{(-\text{CH}_2)}$ ,  $\delta_{(-\text{CH}_3)}$ ), 1351 ( $\delta_{(-\text{CH}_3)}$ ), 1312 ( $\nu_{(-\text{RSO}_2\text{R}_-)}$ ), 1287 ( $\nu_{(-\text{C}-\text{O}-\text{C}-)}$ ), 1239 ( $\nu_{(-\text{C}-\text{O}-\text{C}-)}$ ), 1200 ( $\nu_{(-\text{C}-\text{O}-\text{C}-)}$ ), 1123 ( $\nu_{(-\text{C}-\text{O}-\text{C}-)}$ ), 910 ( $\delta_{(=\text{CH})}$ ).

**<sup>1</sup>H-NMR** (400 MHz, CDCl<sub>3</sub>),  $\delta$  [ppm]: 5.87-5.71 (m, 1H, CH<sub>3</sub>OCH<sub>2</sub>CH<sub>2</sub>OCH<sub>2</sub>CH<sub>2</sub>OCH<sub>2</sub>CH<sub>2</sub>SO<sub>2</sub>CH<sub>2</sub>CH<sub>2</sub>CH<sub>2</sub>(CH<sub>2</sub>)<sub>4</sub>CH<sub>2</sub>CH<sub>2</sub>CH=CH<sub>2</sub>), 5.03-4.86 (m, 2H, CH<sub>3</sub>OCH<sub>2</sub>CH<sub>2</sub>OCH<sub>2</sub>CH<sub>2</sub>OCH<sub>2</sub>CH<sub>2</sub>SO<sub>2</sub>CH<sub>2</sub>CH<sub>2</sub>CH<sub>2</sub>(CH<sub>2</sub>)<sub>4</sub>CH<sub>2</sub>CH<sub>2</sub>CH=CH<sub>2</sub>), 3.89 (t, <sup>3</sup>J<sub>HH</sub> = 5.4 Hz, 2H, CH<sub>3</sub>OCH<sub>2</sub>CH<sub>2</sub>OCH<sub>2</sub>CH<sub>2</sub>OCH<sub>2</sub>CH<sub>2</sub>SO<sub>2</sub>CH<sub>2</sub>CH<sub>2</sub>CH<sub>2</sub>(CH<sub>2</sub>)<sub>4</sub>CH<sub>2</sub>CH<sub>2</sub>CH=CH<sub>2</sub>), 3.69-3.51 (m, 6H, CH<sub>3</sub>OCH<sub>2</sub>CH<sub>2</sub>OCH<sub>2</sub>CH<sub>2</sub>OCH<sub>2</sub>CH<sub>2</sub>SO<sub>2</sub>CH<sub>2</sub>CH<sub>2</sub>CH<sub>2</sub>(CH<sub>2</sub>)<sub>4</sub>CH<sub>2</sub>CH<sub>2</sub>CH=CH<sub>2</sub>), 3.50-3.47 (m, 2H, CH<sub>3</sub>OCH<sub>2</sub>CH<sub>2</sub>OCH<sub>2</sub>CH<sub>2</sub>OCH<sub>2</sub>CH<sub>2</sub>SO<sub>2</sub>CH<sub>2</sub>CH<sub>2</sub>CH<sub>2</sub>(CH<sub>2</sub>)<sub>4</sub>CH<sub>2</sub>CH<sub>2</sub>CH=CH<sub>2</sub>), 3.35 (s, 3H, CH<sub>3</sub>OCH<sub>2</sub>CH<sub>2</sub>OCH<sub>2</sub>CH<sub>2</sub>OCH<sub>2</sub>CH<sub>2</sub>SO<sub>2</sub>CH<sub>2</sub>CH<sub>2</sub>CH<sub>2</sub>(CH<sub>2</sub>)<sub>4</sub>CH<sub>2</sub>CH<sub>2</sub>CH=CH<sub>2</sub>), 3.17 (t, <sup>3</sup>J<sub>HH</sub> = 5.4 Hz, 2H, CH<sub>3</sub>OCH<sub>2</sub>CH<sub>2</sub>OCH<sub>2</sub>CH<sub>2</sub>OCH<sub>2</sub>CH<sub>2</sub>SO<sub>2</sub>CH<sub>2</sub>CH<sub>2</sub>CH<sub>2</sub>(CH<sub>2</sub>)<sub>4</sub>CH<sub>2</sub>CH<sub>2</sub>CH=CH<sub>2</sub>), 3.07 (t, <sup>3</sup>J<sub>HH</sub> = 8.1 Hz, 2H, CH<sub>3</sub>OCH<sub>2</sub>CH<sub>2</sub>OCH<sub>2</sub>CH<sub>2</sub>OCH<sub>2</sub>CH<sub>2</sub>SO<sub>2</sub>CH<sub>2</sub>CH<sub>2</sub>CH<sub>2</sub>(CH<sub>2</sub>)<sub>4</sub>CH<sub>2</sub>CH<sub>2</sub>CH=CH<sub>2</sub>), 2.02 (q, <sup>3</sup>J<sub>HH</sub> = 7.1 Hz, 2H, CH<sub>3</sub>OCH<sub>2</sub>CH<sub>2</sub>OCH<sub>2</sub>CH<sub>2</sub>OCH<sub>2</sub>CH<sub>2</sub>SO<sub>2</sub>CH<sub>2</sub>CH<sub>2</sub>CH<sub>2</sub>(CH<sub>2</sub>)<sub>4</sub>CH<sub>2</sub>CH<sub>2</sub>CH=CH<sub>2</sub>), 1.90-1.74 (m, 2H, CH<sub>3</sub>OCH<sub>2</sub>CH<sub>2</sub>OCH<sub>2</sub>CH<sub>2</sub>OCH<sub>2</sub>CH<sub>2</sub>SO<sub>2</sub>CH<sub>2</sub>CH<sub>2</sub>CH<sub>2</sub>(CH<sub>2</sub>)<sub>4</sub>CH<sub>2</sub>CH<sub>2</sub>CH=CH<sub>2</sub>), 1.49-1.19 (m, 12H, CH<sub>3</sub>OCH<sub>2</sub>CH<sub>2</sub>OCH<sub>2</sub>CH<sub>2</sub>OCH<sub>2</sub>CH<sub>2</sub>SO<sub>2</sub>CH<sub>2</sub>CH<sub>2</sub>CH<sub>2</sub>(CH<sub>2</sub>)<sub>4</sub>CH<sub>2</sub>CH<sub>2</sub>CH=CH<sub>2</sub>).

**<sup>13</sup>C-NMR** (100 MHz, CDCl<sub>3</sub>),  $\delta$  [ppm]:

139.04 (CH<sub>3</sub>OCH<sub>2</sub>CH<sub>2</sub>OCH<sub>2</sub>CH<sub>2</sub>OCH<sub>2</sub>CH<sub>2</sub>SO<sub>2</sub>CH<sub>2</sub>CH<sub>2</sub>CH<sub>2</sub>(CH<sub>2</sub>)<sub>4</sub>CH<sub>2</sub>CH<sub>2</sub>CH=CH<sub>2</sub>), 114.10 (CH<sub>3</sub>OCH<sub>2</sub>CH<sub>2</sub>OCH<sub>2</sub>CH<sub>2</sub>OCH<sub>2</sub>CH<sub>2</sub>SO<sub>2</sub>CH<sub>2</sub>CH<sub>2</sub>CH<sub>2</sub>(CH<sub>2</sub>)<sub>4</sub>CH<sub>2</sub>CH<sub>2</sub>CH=CH<sub>2</sub>), 71.85 (CH<sub>3</sub>OCH<sub>2</sub>CH<sub>2</sub>OCH<sub>2</sub>CH<sub>2</sub>OCH<sub>2</sub>CH<sub>2</sub>SO<sub>2</sub>CH<sub>2</sub>CH<sub>2</sub>CH<sub>2</sub>(CH<sub>2</sub>)<sub>4</sub>CH<sub>2</sub>CH<sub>2</sub>CH=CH<sub>2</sub>), 70.50, 70.44, 70.25 (CH<sub>3</sub>OCH<sub>2</sub>CH<sub>2</sub>OCH<sub>2</sub>CH<sub>2</sub>OCH<sub>2</sub>CH<sub>2</sub>SO<sub>2</sub>CH<sub>2</sub>CH<sub>2</sub>CH<sub>2</sub>(CH<sub>2</sub>)<sub>4</sub>CH<sub>2</sub>CH<sub>2</sub>CH=CH<sub>2</sub>), 64.75 (CH<sub>3</sub>OCH<sub>2</sub>CH<sub>2</sub>OCH<sub>2</sub>CH<sub>2</sub>OCH<sub>2</sub>CH<sub>2</sub>SO<sub>2</sub>CH<sub>2</sub>CH<sub>2</sub>CH<sub>2</sub>(CH<sub>2</sub>)<sub>4</sub>CH<sub>2</sub>CH<sub>2</sub>CH=CH<sub>2</sub>), 58.96 (CH<sub>3</sub>OCH<sub>2</sub>CH<sub>2</sub>OCH<sub>2</sub>CH<sub>2</sub>OCH<sub>2</sub>CH<sub>2</sub>SO<sub>2</sub>CH<sub>2</sub>CH<sub>2</sub>CH<sub>2</sub>(CH<sub>2</sub>)<sub>4</sub>CH<sub>2</sub>CH<sub>2</sub>CH=CH<sub>2</sub>), 54.76 (CH<sub>3</sub>OCH<sub>2</sub>CH<sub>2</sub>OCH<sub>2</sub>CH<sub>2</sub>OCH<sub>2</sub>CH<sub>2</sub>SO<sub>2</sub>CH<sub>2</sub>CH<sub>2</sub>CH<sub>2</sub>(CH<sub>2</sub>)<sub>4</sub>CH<sub>2</sub>CH<sub>2</sub>CH=CH<sub>2</sub>), 53.19 (CH<sub>3</sub>OCH<sub>2</sub>CH<sub>2</sub>OCH<sub>2</sub>CH<sub>2</sub>OCH<sub>2</sub>CH<sub>2</sub>SO<sub>2</sub>CH<sub>2</sub>CH<sub>2</sub>CH<sub>2</sub>(CH<sub>2</sub>)<sub>4</sub>CH<sub>2</sub>CH<sub>2</sub>CH=CH<sub>2</sub>), 33.69 (CH<sub>3</sub>OCH<sub>2</sub>CH<sub>2</sub>OCH<sub>2</sub>CH<sub>2</sub>OCH<sub>2</sub>CH<sub>2</sub>SO<sub>2</sub>CH<sub>2</sub>CH<sub>2</sub>CH<sub>2</sub>(CH<sub>2</sub>)<sub>4</sub>CH<sub>2</sub>CH<sub>2</sub>CH=CH<sub>2</sub>), 29.27, 29.16, 29.03, 28.97, 28.80, 28.43 (CH<sub>3</sub>OCH<sub>2</sub>CH<sub>2</sub>OCH<sub>2</sub>CH<sub>2</sub>OCH<sub>2</sub>CH<sub>2</sub>SO<sub>2</sub>CH<sub>2</sub>CH<sub>2</sub>CH<sub>2</sub>(CH<sub>2</sub>)<sub>4</sub>CH<sub>2</sub>CH<sub>2</sub>CH=CH<sub>2</sub>), 21.78 (CH<sub>3</sub>OCH<sub>2</sub>CH<sub>2</sub>OCH<sub>2</sub>CH<sub>2</sub>OCH<sub>2</sub>CH<sub>2</sub>SO<sub>2</sub>CH<sub>2</sub>CH<sub>2</sub>CH<sub>2</sub>(CH<sub>2</sub>)<sub>4</sub>CH<sub>2</sub>CH<sub>2</sub>CH=CH<sub>2</sub>).

**HRMS (ESI, m/z):** [M + Na]<sup>+</sup> calcd for C<sub>18</sub>H<sub>36</sub>NaO<sub>5</sub>S, 387.2181; found 387.2176.

MeEG<sub>6</sub>SO<sub>2</sub>Un **6b**

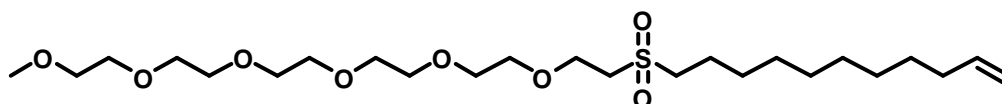

To compound MeEG<sub>6</sub>SUn **5b** (1.0 g, 2.2 mmol) was slowly added H<sub>2</sub>O<sub>2</sub> (70%, 0.18 mL). The mixture was heated to 50 °C for 30 min and then was stirred at room temperature for 24 h. Dichloromethane was added and the solvent was removed under reduced pressure to yield 1.2 g. The residue was purified by chromatography on silica gel using ethylacetate/ ethanol (10->20%) as eluent to yield MeEG<sub>6</sub>SO<sub>2</sub>Un **6b** as a colourless oil (0.5 g, 1.0 mmol, 46 % yield).

**Yield:** 0.5 g (1.0 mmol, 46 %), colourless oil.

**IR**  $\nu_{\max}$  (KBr)/cm<sup>-1</sup> 3075 ( $\nu_{(-CH_2)}$ ), 2925 ( $\nu_{(-CH_3)}$ ,  $\nu_{(-CH_2)}$ ), 2854 ( $\nu_{(-CH_2)}$ ), 1640 ( $\nu_{(C=C)}$ ), 1463 ( $\delta_{(-CH_2)}$ ,  $\delta_{(-CH_3)}$ ), 1351 ( $\nu_{(-RSO_2R-)}$ ), 1317 ( $\nu_{(-RSO_2R-)}$ ), 1289 ( $\nu_{(-C-O-C-)}$ ), 1251 ( $\nu_{(-C-O-C-)}$ ), 1199 ( $\nu_{(-C-O-C-)}$ ), 1125 ( $\nu_{(-C-O-C-)}$ ).

**<sup>1</sup>H-NMR** (500 MHz, CDCl<sub>3</sub>),  $\delta$  [ppm]: 5.82-5.70 (m, 1H, CH<sub>3</sub>OCH<sub>2</sub>CH<sub>2</sub>(OCH<sub>2</sub>CH<sub>2</sub>)<sub>4</sub>OCH<sub>2</sub>CH<sub>2</sub>SO<sub>2</sub>CH<sub>2</sub>CH<sub>2</sub>CH<sub>2</sub>(CH<sub>2</sub>)<sub>4</sub>CH<sub>2</sub>CH<sub>2</sub>CH=CH<sub>2</sub>), 5.02-4.82 (m, 2H, CH<sub>3</sub>OCH<sub>2</sub>CH<sub>2</sub>(OCH<sub>2</sub>CH<sub>2</sub>)<sub>4</sub>OCH<sub>2</sub>CH<sub>2</sub>SO<sub>2</sub>CH<sub>2</sub>CH<sub>2</sub>CH<sub>2</sub>(CH<sub>2</sub>)<sub>4</sub>CH<sub>2</sub>CH<sub>2</sub>CH=CH<sub>2</sub>), 3.87 (t, <sup>3</sup>J<sub>HH</sub> = 5.4 Hz, 2H,

CH<sub>3</sub>OCH<sub>2</sub>CH<sub>2</sub>(OCH<sub>2</sub>CH<sub>2</sub>)<sub>4</sub>OCH<sub>2</sub>CH<sub>2</sub>SO<sub>2</sub>CH<sub>2</sub>CH<sub>2</sub>CH<sub>2</sub>(CH<sub>2</sub>)<sub>4</sub>CH<sub>2</sub>CH<sub>2</sub>CH=CH<sub>2</sub>), 3.66-3.56 (m, 18H, CH<sub>3</sub>OCH<sub>2</sub>CH<sub>2</sub>(OCH<sub>2</sub>CH<sub>2</sub>)<sub>4</sub>OCH<sub>2</sub>CH<sub>2</sub>SO<sub>2</sub>CH<sub>2</sub>CH<sub>2</sub>CH<sub>2</sub>(CH<sub>2</sub>)<sub>4</sub>CH<sub>2</sub>CH<sub>2</sub>CH=CH<sub>2</sub>), 3.54-3.48 (m, 2H,

CH<sub>3</sub>OCH<sub>2</sub>CH<sub>2</sub>(OCH<sub>2</sub>CH<sub>2</sub>)<sub>4</sub>OCH<sub>2</sub>CH<sub>2</sub>SO<sub>2</sub>CH<sub>2</sub>CH<sub>2</sub>CH<sub>2</sub>(CH<sub>2</sub>)<sub>4</sub>CH<sub>2</sub>CH<sub>2</sub>CH=CH<sub>2</sub>), 3.34 (s, 3H, CH<sub>3</sub>OCH<sub>2</sub>CH<sub>2</sub>(OCH<sub>2</sub>CH<sub>2</sub>)<sub>4</sub>OCH<sub>2</sub>CH<sub>2</sub>SO<sub>2</sub>CH<sub>2</sub>CH<sub>2</sub>CH<sub>2</sub>(CH<sub>2</sub>)<sub>4</sub>CH<sub>2</sub>CH<sub>2</sub>CH=CH<sub>2</sub>), 3.15 (t, <sup>3</sup>J<sub>HH</sub> = 5.4 Hz, 2H,

CH<sub>3</sub>OCH<sub>2</sub>CH<sub>2</sub>(OCH<sub>2</sub>CH<sub>2</sub>)<sub>4</sub>OCH<sub>2</sub>CH<sub>2</sub>SO<sub>2</sub>CH<sub>2</sub>CH<sub>2</sub>CH<sub>2</sub>(CH<sub>2</sub>)<sub>4</sub>CH<sub>2</sub>CH<sub>2</sub>CH=CH<sub>2</sub>), 3.05 (t, <sup>3</sup>J<sub>HH</sub> = 8.0 Hz, 2H,

CH<sub>3</sub>OCH<sub>2</sub>CH<sub>2</sub>(OCH<sub>2</sub>CH<sub>2</sub>)<sub>4</sub>OCH<sub>2</sub>CH<sub>2</sub>SO<sub>2</sub>CH<sub>2</sub>CH<sub>2</sub>CH<sub>2</sub>(CH<sub>2</sub>)<sub>4</sub>CH<sub>2</sub>CH<sub>2</sub>CH=CH<sub>2</sub>), 2.00 (q, <sup>3</sup>J<sub>HH</sub> = 7.1 Hz, 2H,

CH<sub>3</sub>OCH<sub>2</sub>CH<sub>2</sub>(OCH<sub>2</sub>CH<sub>2</sub>)<sub>4</sub>OCH<sub>2</sub>CH<sub>2</sub>SO<sub>2</sub>CH<sub>2</sub>CH<sub>2</sub>CH<sub>2</sub>(CH<sub>2</sub>)<sub>4</sub>CH<sub>2</sub>CH<sub>2</sub>CH=CH<sub>2</sub>), 1.86-1.72 (m, 2H,

CH<sub>3</sub>OCH<sub>2</sub>CH<sub>2</sub>(OCH<sub>2</sub>CH<sub>2</sub>)<sub>4</sub>OCH<sub>2</sub>CH<sub>2</sub>SO<sub>2</sub>CH<sub>2</sub>CH<sub>2</sub>CH<sub>2</sub>(CH<sub>2</sub>)<sub>4</sub>CH<sub>2</sub>CH<sub>2</sub>CH=CH<sub>2</sub>), 1.44-1.20 (m, 12H, CH<sub>3</sub>OCH<sub>2</sub>CH<sub>2</sub>(OCH<sub>2</sub>CH<sub>2</sub>)<sub>4</sub>OCH<sub>2</sub>CH<sub>2</sub>SO<sub>2</sub>CH<sub>2</sub>CH<sub>2</sub>CH<sub>2</sub>(CH<sub>2</sub>)<sub>4</sub>CH<sub>2</sub>CH<sub>2</sub>CH=CH<sub>2</sub>).

**<sup>13</sup>C-NMR** (125 MHz, CDCl<sub>3</sub>),  $\delta$  [ppm]:

138.98 (CH<sub>3</sub>OCH<sub>2</sub>CH<sub>2</sub>(OCH<sub>2</sub>CH<sub>2</sub>)<sub>4</sub>OCH<sub>2</sub>CH<sub>2</sub>SO<sub>2</sub>CH<sub>2</sub>CH<sub>2</sub>CH<sub>2</sub>(CH<sub>2</sub>)<sub>4</sub>CH<sub>2</sub>CH<sub>2</sub>CH=CH<sub>2</sub>), 114.06 (CH<sub>3</sub>OCH<sub>2</sub>CH<sub>2</sub>(OCH<sub>2</sub>CH<sub>2</sub>)<sub>4</sub>OCH<sub>2</sub>CH<sub>2</sub>SO<sub>2</sub>CH<sub>2</sub>CH<sub>2</sub>CH<sub>2</sub>(CH<sub>2</sub>)<sub>4</sub>CH<sub>2</sub>CH<sub>2</sub>CH=CH<sub>2</sub>), 71.82 (CH<sub>3</sub>OCH<sub>2</sub>CH<sub>2</sub>(OCH<sub>2</sub>CH<sub>2</sub>)<sub>4</sub>OCH<sub>2</sub>CH<sub>2</sub>SO<sub>2</sub>CH<sub>2</sub>CH<sub>2</sub>CH<sub>2</sub>(CH<sub>2</sub>)<sub>4</sub>CH<sub>2</sub>CH<sub>2</sub>CH=CH<sub>2</sub>), 70.48, 70.46, 70.39, 70.20,

(CH<sub>3</sub>OCH<sub>2</sub>CH<sub>2</sub>(OCH<sub>2</sub>CH<sub>2</sub>)<sub>4</sub>OCH<sub>2</sub>CH<sub>2</sub>SO<sub>2</sub>CH<sub>2</sub>CH<sub>2</sub>CH<sub>2</sub>(CH<sub>2</sub>)<sub>4</sub>CH<sub>2</sub>CH<sub>2</sub>CH=CH<sub>2</sub>),

64.71 (CH<sub>3</sub>OCH<sub>2</sub>CH<sub>2</sub>(OCH<sub>2</sub>CH<sub>2</sub>)<sub>4</sub>OCH<sub>2</sub>CH<sub>2</sub>SO<sub>2</sub>CH<sub>2</sub>CH<sub>2</sub>CH<sub>2</sub>(CH<sub>2</sub>)<sub>4</sub>CH<sub>2</sub>CH<sub>2</sub>CH=CH<sub>2</sub>),

58.88 (CH<sub>3</sub>OCH<sub>2</sub>CH<sub>2</sub>(OCH<sub>2</sub>CH<sub>2</sub>)<sub>4</sub>OCH<sub>2</sub>CH<sub>2</sub>SO<sub>2</sub>CH<sub>2</sub>CH<sub>2</sub>CH<sub>2</sub>(CH<sub>2</sub>)<sub>4</sub>CH<sub>2</sub>CH<sub>2</sub>CH=CH<sub>2</sub>),

54.70 (CH<sub>3</sub>OCH<sub>2</sub>CH<sub>2</sub>(OCH<sub>2</sub>CH<sub>2</sub>)<sub>4</sub>OCH<sub>2</sub>CH<sub>2</sub>SO<sub>2</sub>CH<sub>2</sub>CH<sub>2</sub>CH<sub>2</sub>(CH<sub>2</sub>)<sub>4</sub>CH<sub>2</sub>CH<sub>2</sub>CH=CH<sub>2</sub>),

53.16 (CH<sub>3</sub>OCH<sub>2</sub>CH<sub>2</sub>(OCH<sub>2</sub>CH<sub>2</sub>)<sub>4</sub>OCH<sub>2</sub>CH<sub>2</sub>SO<sub>2</sub>CH<sub>2</sub>CH<sub>2</sub>CH<sub>2</sub>(CH<sub>2</sub>)<sub>4</sub>CH<sub>2</sub>CH<sub>2</sub>CH=CH<sub>2</sub>),

33.63 (CH<sub>3</sub>OCH<sub>2</sub>CH<sub>2</sub>(OCH<sub>2</sub>CH<sub>2</sub>)<sub>4</sub>OCH<sub>2</sub>CH<sub>2</sub>SO<sub>2</sub>CH<sub>2</sub>CH<sub>2</sub>CH<sub>2</sub>(CH<sub>2</sub>)<sub>4</sub>CH<sub>2</sub>CH<sub>2</sub>CH=CH<sub>2</sub>),

29.22, 29.10, 28.98, 28.92, 28.75, 28.38

(CH<sub>3</sub>OCH<sub>2</sub>CH<sub>2</sub>(OCH<sub>2</sub>CH<sub>2</sub>)<sub>4</sub>OCH<sub>2</sub>CH<sub>2</sub>SO<sub>2</sub>CH<sub>2</sub>CH<sub>2</sub>CH<sub>2</sub>(CH<sub>2</sub>)<sub>4</sub>CH<sub>2</sub>CH<sub>2</sub>CH=CH<sub>2</sub>),

21.73 (CH<sub>3</sub>OCH<sub>2</sub>CH<sub>2</sub>(OCH<sub>2</sub>CH<sub>2</sub>)<sub>4</sub>OCH<sub>2</sub>CH<sub>2</sub>SO<sub>2</sub>CH<sub>2</sub>CH<sub>2</sub>CH<sub>2</sub>(CH<sub>2</sub>)<sub>4</sub>CH<sub>2</sub>CH<sub>2</sub>CH=CH<sub>2</sub>).

**HRMS (ESI, m/z):** [M + Na]<sup>+</sup> calcd for C<sub>24</sub>H<sub>48</sub>NaO<sub>8</sub>S, 519.2968; 519.2962.

**Anal.** calcd for C<sub>24</sub>H<sub>48</sub>O<sub>8</sub>S: C 58.03, H 9.74, S 6.46; found: C 57.40, H 9.64, S 6.57.

**Thioacetylation of the double bonds to yield MeEG<sub>n</sub>SO<sub>2</sub>UnSAc **7a** (n = 3), **7b** (n = 6)**

MeEG<sub>3</sub>SO<sub>2</sub>UnSAc **7a**; Typical Procedure<sup>7</sup>



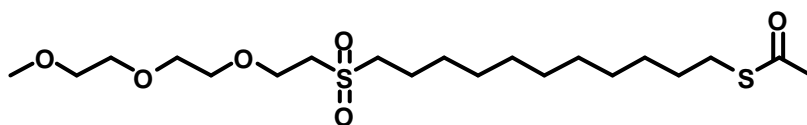

To a solution of MeEG<sub>3</sub>SO<sub>2</sub>Un **6a** (0.6 g, 1.6 mmol) in dry THF (23 mL) was added thioacetic acid (0.6 g, 7.9 mmol). The mixture was irradiated with a 25 W mercury lamp. After 6 h the solvent and the excess of thioacetic acid were removed in vacuum. The residue was dissolved in dichloromethane and washed with water. The organic phase was removed under reduced pressure to yield 0.8 g. The residue was purified twice by chromatography on Al<sub>2</sub>O<sub>3</sub> using dichloromethane/ethyl acetate (1% → 3% → 10%) as eluent to yield MeEG<sub>3</sub>SO<sub>2</sub>UnSAc **7a** as a slight yellow oil (0.45 g, 1.0 mmol, 64 % yield).

**Yield:** 0.45 g (1.0 mmol, 64 %), slight yellow oil.

**IR**  $\nu_{\max}$  (KBr)/cm<sup>-1</sup> 2925 ( $\nu_{(-\text{CH}_3)}$ ,  $\nu_{(-\text{CH}_2)}$ ), 2855 ( $\nu_{(-\text{CH}_2)}$ ), 1690 ( $\nu_{(\text{C}=\text{O})}$ ), 1463 ( $\delta_{(-\text{CH}_2)}$ ,  $\delta_{(-\text{CH}_3)}$ ), 1354 ( $\nu_{(-\text{RSO}_2\text{R}-)}$ ), 1317 ( $\nu_{(-\text{RSO}_2\text{R}-)}$ ), 1288 ( $\nu_{(-\text{C}-\text{O}-\text{C}-)}$ ), 1251 ( $\nu_{(-\text{C}-\text{O}-\text{C}-)}$ ), 1199 ( $\nu_{(-\text{C}-\text{O}-\text{C}-)}$ ), 1128 ( $\nu_{(-\text{C}-\text{O}-\text{C}-)}$ ).

**<sup>1</sup>H-NMR** (500 MHz, CDCl<sub>3</sub>),  $\delta$  [ppm]: 3.89 (t, <sup>3</sup> $J_{\text{HH}} = 5.4$  Hz, 2H, CH<sub>3</sub>OCH<sub>2</sub>CH<sub>2</sub>OCH<sub>2</sub>CH<sub>2</sub>OCH<sub>2</sub>CH<sub>2</sub>SO<sub>2</sub>CH<sub>2</sub>CH<sub>2</sub>CH<sub>2</sub>(CH<sub>2</sub>)<sub>4</sub>CH<sub>2</sub>CH<sub>2</sub>CH<sub>2</sub>CH<sub>2</sub>SCOCH<sub>3</sub>), 3.67-3.56 (m, 6H, CH<sub>3</sub>OCH<sub>2</sub>CH<sub>2</sub>OCH<sub>2</sub>CH<sub>2</sub>OCH<sub>2</sub>CH<sub>2</sub>SO<sub>2</sub>CH<sub>2</sub>CH<sub>2</sub>CH<sub>2</sub>(CH<sub>2</sub>)<sub>4</sub>CH<sub>2</sub>CH<sub>2</sub>CH<sub>2</sub>CH<sub>2</sub>SCOCH<sub>3</sub>), 3.55-3.47 (m, 2H, CH<sub>3</sub>OCH<sub>2</sub>CH<sub>2</sub>OCH<sub>2</sub>CH<sub>2</sub>OCH<sub>2</sub>CH<sub>2</sub>SO<sub>2</sub>CH<sub>2</sub>CH<sub>2</sub>CH<sub>2</sub>(CH<sub>2</sub>)<sub>4</sub>CH<sub>2</sub>CH<sub>2</sub>CH<sub>2</sub>CH<sub>2</sub>SCOCH<sub>3</sub>), 3.35 (s, 3H, CH<sub>3</sub>OCH<sub>2</sub>CH<sub>2</sub>OCH<sub>2</sub>CH<sub>2</sub>OCH<sub>2</sub>CH<sub>2</sub>SO<sub>2</sub>CH<sub>2</sub>CH<sub>2</sub>CH<sub>2</sub>(CH<sub>2</sub>)<sub>4</sub>CH<sub>2</sub>CH<sub>2</sub>CH<sub>2</sub>CH<sub>2</sub>SCOCH<sub>3</sub>), 3.17 (t, <sup>3</sup> $J_{\text{HH}} = 5.4$  Hz, 2H, CH<sub>3</sub>OCH<sub>2</sub>CH<sub>2</sub>OCH<sub>2</sub>CH<sub>2</sub>OCH<sub>2</sub>CH<sub>2</sub>SO<sub>2</sub>CH<sub>2</sub>CH<sub>2</sub>CH<sub>2</sub>(CH<sub>2</sub>)<sub>4</sub>CH<sub>2</sub>CH<sub>2</sub>CH<sub>2</sub>CH<sub>2</sub>SCOCH<sub>3</sub>), 3.07 (t, <sup>3</sup> $J_{\text{HH}} = 8.1$  Hz, 2H, CH<sub>3</sub>OCH<sub>2</sub>CH<sub>2</sub>OCH<sub>2</sub>CH<sub>2</sub>OCH<sub>2</sub>CH<sub>2</sub>SO<sub>2</sub>CH<sub>2</sub>CH<sub>2</sub>CH<sub>2</sub>(CH<sub>2</sub>)<sub>4</sub>CH<sub>2</sub>CH<sub>2</sub>CH<sub>2</sub>CH<sub>2</sub>SCOCH<sub>3</sub>), 2.84 (t, <sup>3</sup> $J_{\text{HH}} = 7.4$  Hz, 2H, CH<sub>3</sub>OCH<sub>2</sub>CH<sub>2</sub>OCH<sub>2</sub>CH<sub>2</sub>OCH<sub>2</sub>CH<sub>2</sub>SO<sub>2</sub>CH<sub>2</sub>CH<sub>2</sub>CH<sub>2</sub>(CH<sub>2</sub>)<sub>4</sub>CH<sub>2</sub>CH<sub>2</sub>CH<sub>2</sub>CH<sub>2</sub>SCOCH<sub>3</sub>), 2.30 (s, 3H, CH<sub>3</sub>OCH<sub>2</sub>CH<sub>2</sub>OCH<sub>2</sub>CH<sub>2</sub>OCH<sub>2</sub>CH<sub>2</sub>SO<sub>2</sub>CH<sub>2</sub>CH<sub>2</sub>CH<sub>2</sub>(CH<sub>2</sub>)<sub>4</sub>CH<sub>2</sub>CH<sub>2</sub>CH<sub>2</sub>CH<sub>2</sub>SCOCH<sub>3</sub>), 1.87-1.74 (m, 2H, CH<sub>3</sub>OCH<sub>2</sub>CH<sub>2</sub>OCH<sub>2</sub>CH<sub>2</sub>OCH<sub>2</sub>CH<sub>2</sub>SO<sub>2</sub>CH<sub>2</sub>CH<sub>2</sub>CH<sub>2</sub>(CH<sub>2</sub>)<sub>4</sub>CH<sub>2</sub>CH<sub>2</sub>CH<sub>2</sub>CH<sub>2</sub>SCOCH<sub>3</sub>), 1.59-1.47 (m, 2H, CH<sub>3</sub>OCH<sub>2</sub>CH<sub>2</sub>OCH<sub>2</sub>CH<sub>2</sub>OCH<sub>2</sub>CH<sub>2</sub>SO<sub>2</sub>CH<sub>2</sub>CH<sub>2</sub>CH<sub>2</sub>(CH<sub>2</sub>)<sub>4</sub>CH<sub>2</sub>CH<sub>2</sub>CH<sub>2</sub>CH<sub>2</sub>SCOCH<sub>3</sub>), 1.45-1.35 (m, 2H, CH<sub>3</sub>OCH<sub>2</sub>CH<sub>2</sub>OCH<sub>2</sub>CH<sub>2</sub>OCH<sub>2</sub>CH<sub>2</sub>SO<sub>2</sub>CH<sub>2</sub>CH<sub>2</sub>CH<sub>2</sub>(CH<sub>2</sub>)<sub>4</sub>CH<sub>2</sub>CH<sub>2</sub>CH<sub>2</sub>CH<sub>2</sub>SCOCH<sub>3</sub>), 1.35-1.16 (m, 12H, CH<sub>3</sub>OCH<sub>2</sub>CH<sub>2</sub>OCH<sub>2</sub>CH<sub>2</sub>OCH<sub>2</sub>CH<sub>2</sub>SO<sub>2</sub>CH<sub>2</sub>CH<sub>2</sub>CH<sub>2</sub>(CH<sub>2</sub>)<sub>4</sub>CH<sub>2</sub>CH<sub>2</sub>CH<sub>2</sub>CH<sub>2</sub>SCOCH<sub>3</sub>).

**<sup>13</sup>C-NMR** (125 MHz, CDCl<sub>3</sub>),  $\delta$  [ppm]:

195.91  
(CH<sub>3</sub>OCH<sub>2</sub>CH<sub>2</sub>OCH<sub>2</sub>CH<sub>2</sub>OCH<sub>2</sub>CH<sub>2</sub>SO<sub>2</sub>CH<sub>2</sub>CH<sub>2</sub>CH<sub>2</sub>(CH<sub>2</sub>)<sub>4</sub>CH<sub>2</sub>CH<sub>2</sub>CH<sub>2</sub>CH<sub>2</sub>SCOCH<sub>3</sub>),  
71.86 (CH<sub>3</sub>OCH<sub>2</sub>CH<sub>2</sub>OCH<sub>2</sub>CH<sub>2</sub>OCH<sub>2</sub>CH<sub>2</sub>SO<sub>2</sub>CH<sub>2</sub>CH<sub>2</sub>CH<sub>2</sub>(CH<sub>2</sub>)<sub>4</sub>CH<sub>2</sub>CH<sub>2</sub>CH<sub>2</sub>CH<sub>2</sub>SCOCH<sub>3</sub>),  
70.51, 70.44, 70.26  
(CH<sub>3</sub>OCH<sub>2</sub>CH<sub>2</sub>OCH<sub>2</sub>CH<sub>2</sub>OCH<sub>2</sub>CH<sub>2</sub>SO<sub>2</sub>CH<sub>2</sub>CH<sub>2</sub>CH<sub>2</sub>(CH<sub>2</sub>)<sub>4</sub>CH<sub>2</sub>CH<sub>2</sub>CH<sub>2</sub>CH<sub>2</sub>SCOCH<sub>3</sub>),  
64.75 (CH<sub>3</sub>OCH<sub>2</sub>CH<sub>2</sub>OCH<sub>2</sub>CH<sub>2</sub>OCH<sub>2</sub>CH<sub>2</sub>SO<sub>2</sub>CH<sub>2</sub>CH<sub>2</sub>CH<sub>2</sub>(CH<sub>2</sub>)<sub>4</sub>CH<sub>2</sub>CH<sub>2</sub>CH<sub>2</sub>CH<sub>2</sub>SCOCH<sub>3</sub>),  
58.96 (CH<sub>3</sub>OCH<sub>2</sub>CH<sub>2</sub>OCH<sub>2</sub>CH<sub>2</sub>OCH<sub>2</sub>CH<sub>2</sub>SO<sub>2</sub>CH<sub>2</sub>CH<sub>2</sub>CH<sub>2</sub>(CH<sub>2</sub>)<sub>4</sub>CH<sub>2</sub>CH<sub>2</sub>CH<sub>2</sub>CH<sub>2</sub>SCOCH<sub>3</sub>),  
54.76 (CH<sub>3</sub>OCH<sub>2</sub>CH<sub>2</sub>OCH<sub>2</sub>CH<sub>2</sub>OCH<sub>2</sub>CH<sub>2</sub>SO<sub>2</sub>CH<sub>2</sub>CH<sub>2</sub>CH<sub>2</sub>(CH<sub>2</sub>)<sub>4</sub>CH<sub>2</sub>CH<sub>2</sub>CH<sub>2</sub>CH<sub>2</sub>SCOCH<sub>3</sub>),  
53.21 (CH<sub>3</sub>OCH<sub>2</sub>CH<sub>2</sub>OCH<sub>2</sub>CH<sub>2</sub>OCH<sub>2</sub>CH<sub>2</sub>SO<sub>2</sub>CH<sub>2</sub>CH<sub>2</sub>CH<sub>2</sub>(CH<sub>2</sub>)<sub>4</sub>CH<sub>2</sub>CH<sub>2</sub>CH<sub>2</sub>CH<sub>2</sub>SCOCH<sub>3</sub>),  
30.55 (CH<sub>3</sub>OCH<sub>2</sub>CH<sub>2</sub>OCH<sub>2</sub>CH<sub>2</sub>OCH<sub>2</sub>CH<sub>2</sub>SO<sub>2</sub>CH<sub>2</sub>CH<sub>2</sub>CH<sub>2</sub>(CH<sub>2</sub>)<sub>4</sub>CH<sub>2</sub>CH<sub>2</sub>CH<sub>2</sub>CH<sub>2</sub>SCOCH<sub>3</sub>),

29.41 (CH<sub>3</sub>OCH<sub>2</sub>CH<sub>2</sub>OCH<sub>2</sub>CH<sub>2</sub>OCH<sub>2</sub>CH<sub>2</sub>SO<sub>2</sub>CH<sub>2</sub>CH<sub>2</sub>CH<sub>2</sub>(CH<sub>2</sub>)<sub>4</sub>CH<sub>2</sub>CH<sub>2</sub>CH<sub>2</sub>CH<sub>2</sub>SCOCH<sub>3</sub>),  
29.38, 29.31, 29.17, 29.04, 28.98

(CH<sub>3</sub>OCH<sub>2</sub>CH<sub>2</sub>OCH<sub>2</sub>CH<sub>2</sub>OCH<sub>2</sub>CH<sub>2</sub>SO<sub>2</sub>CH<sub>2</sub>CH<sub>2</sub>CH<sub>2</sub>(CH<sub>2</sub>)<sub>4</sub>CH<sub>2</sub>CH<sub>2</sub>CH<sub>2</sub>CH<sub>2</sub>SCOCH<sub>3</sub>),  
28.70 (CH<sub>3</sub>OCH<sub>2</sub>CH<sub>2</sub>OCH<sub>2</sub>CH<sub>2</sub>OCH<sub>2</sub>CH<sub>2</sub>SO<sub>2</sub>CH<sub>2</sub>CH<sub>2</sub>CH<sub>2</sub>(CH<sub>2</sub>)<sub>4</sub>CH<sub>2</sub>CH<sub>2</sub>CH<sub>2</sub>CH<sub>2</sub>SCOCH<sub>3</sub>),  
28.43 (CH<sub>3</sub>OCH<sub>2</sub>CH<sub>2</sub>OCH<sub>2</sub>CH<sub>2</sub>OCH<sub>2</sub>CH<sub>2</sub>SO<sub>2</sub>CH<sub>2</sub>CH<sub>2</sub>CH<sub>2</sub>(CH<sub>2</sub>)<sub>4</sub>CH<sub>2</sub>CH<sub>2</sub>CH<sub>2</sub>CH<sub>2</sub>SCOCH<sub>3</sub>),  
21.78 (CH<sub>3</sub>OCH<sub>2</sub>CH<sub>2</sub>OCH<sub>2</sub>CH<sub>2</sub>OCH<sub>2</sub>CH<sub>2</sub>SO<sub>2</sub>CH<sub>2</sub>CH<sub>2</sub>CH<sub>2</sub>(CH<sub>2</sub>)<sub>4</sub>CH<sub>2</sub>CH<sub>2</sub>CH<sub>2</sub>CH<sub>2</sub>SCOCH<sub>3</sub>).

**HRMS (ESI, m/z):** [M + Na]<sup>+</sup> calcd for C<sub>20</sub>H<sub>40</sub>NaO<sub>6</sub>S<sub>2</sub>, 463.2164; found 463.2159.

### MeEG<sub>6</sub>SO<sub>2</sub>UnSAc **7b**

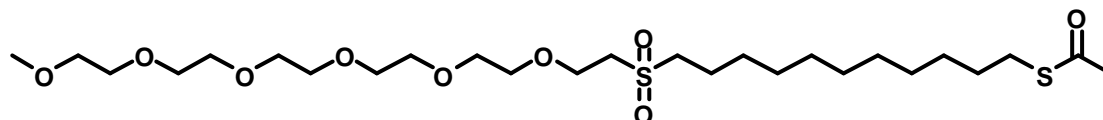

MeEG<sub>6</sub>SO<sub>2</sub>Un **6b** (0.7 g, 1.5 mmol) and thioacetic acid (0.5 g, 6.6 mmol) in dry THF (10 mL) were irradiated and isolated as stated above. For chromatography on silica gel ethyl acetate/ethanol (1%→5%→10%) was used as eluent to yield MeEG<sub>6</sub>SO<sub>2</sub>UnSAc **7b** as a slightly yellow oil (0.8 g, 1.4 mmol, 95 % yield).

**Yield:** 0.8 g (1.4 mmol, 95 %), slightly yellow oil.

**IR**  $\nu_{\max}$  (KBr)/cm<sup>-1</sup> 2929 ( $\nu_{(-\text{CH}_3)}$ ,  $\nu_{(-\text{CH}_2)}$ ), 2872 ( $\nu_{(-\text{CH}_2)}$ ), 1692 ( $\nu_{(\text{C}=\text{O})}$ ), 1464 ( $\delta_{(-\text{CH}_2)}$ ,  $\delta_{(-\text{CH}_3)}$ ), 1354 ( $\nu_{(-\text{RSO}_2\text{R}-)}$ ), 1317 ( $\nu_{(-\text{RSO}_2\text{R}-)}$ ), 1289 ( $\nu_{(-\text{C}-\text{O}-\text{C}-)}$ ), 1252 ( $\nu_{(-\text{C}-\text{O}-\text{C}-)}$ ), 1200 ( $\nu_{(-\text{C}-\text{O}-\text{C}-)}$ ), 1114 ( $\nu_{(-\text{C}-\text{O}-\text{C}-)}$ ).

**<sup>1</sup>H-NMR** (400 MHz, CDCl<sub>3</sub>),  $\delta$  [ppm]: 3.87 (t, <sup>3</sup>J<sub>HH</sub> = 5.4 Hz, 2H, CH<sub>3</sub>OCH<sub>2</sub>CH<sub>2</sub>(OCH<sub>2</sub>CH<sub>2</sub>)<sub>4</sub>OCH<sub>2</sub>CH<sub>2</sub>SO<sub>2</sub>CH<sub>2</sub>CH<sub>2</sub>CH<sub>2</sub>(CH<sub>2</sub>)<sub>4</sub>CH<sub>2</sub>CH<sub>2</sub>CH<sub>2</sub>CH<sub>2</sub>SCOCH<sub>3</sub>), 3.66-3.56 (m, 18H, CH<sub>3</sub>OCH<sub>2</sub>CH<sub>2</sub>(OCH<sub>2</sub>CH<sub>2</sub>)<sub>4</sub>OCH<sub>2</sub>CH<sub>2</sub>SO<sub>2</sub>CH<sub>2</sub>CH<sub>2</sub>CH<sub>2</sub>(CH<sub>2</sub>)<sub>4</sub>CH<sub>2</sub>CH<sub>2</sub>CH<sub>2</sub>CH<sub>2</sub>SCOCH<sub>3</sub>), 3.54-3.47 (m, 2H, CH<sub>3</sub>OCH<sub>2</sub>CH<sub>2</sub>(OCH<sub>2</sub>CH<sub>2</sub>)<sub>4</sub>OCH<sub>2</sub>CH<sub>2</sub>SO<sub>2</sub>CH<sub>2</sub>CH<sub>2</sub>CH<sub>2</sub>(CH<sub>2</sub>)<sub>4</sub>CH<sub>2</sub>CH<sub>2</sub>CH<sub>2</sub>CH<sub>2</sub>SCOCH<sub>3</sub>), 3.33 (s, 3H, CH<sub>3</sub>OCH<sub>2</sub>CH<sub>2</sub>(OCH<sub>2</sub>CH<sub>2</sub>)<sub>4</sub>OCH<sub>2</sub>CH<sub>2</sub>SO<sub>2</sub>CH<sub>2</sub>CH<sub>2</sub>CH<sub>2</sub>(CH<sub>2</sub>)<sub>4</sub>CH<sub>2</sub>CH<sub>2</sub>CH<sub>2</sub>CH<sub>2</sub>SCOCH<sub>3</sub>), 3.15 (t, <sup>3</sup>J<sub>HH</sub> = 5.4 Hz, 2H, CH<sub>3</sub>OCH<sub>2</sub>CH<sub>2</sub>(OCH<sub>2</sub>CH<sub>2</sub>)<sub>4</sub>OCH<sub>2</sub>CH<sub>2</sub>SO<sub>2</sub>CH<sub>2</sub>CH<sub>2</sub>CH<sub>2</sub>(CH<sub>2</sub>)<sub>4</sub>CH<sub>2</sub>CH<sub>2</sub>CH<sub>2</sub>CH<sub>2</sub>SCOCH<sub>3</sub>), 3.04 (t, <sup>3</sup>J<sub>HH</sub> = 8.0 Hz, 2H, CH<sub>3</sub>OCH<sub>2</sub>CH<sub>2</sub>(OCH<sub>2</sub>CH<sub>2</sub>)<sub>4</sub>OCH<sub>2</sub>CH<sub>2</sub>SO<sub>2</sub>CH<sub>2</sub>CH<sub>2</sub>CH<sub>2</sub>(CH<sub>2</sub>)<sub>4</sub>CH<sub>2</sub>CH<sub>2</sub>CH<sub>2</sub>CH<sub>2</sub>SCOCH<sub>3</sub>), 2.82 (t, <sup>3</sup>J<sub>HH</sub> = 7.4 Hz, 2H, CH<sub>3</sub>OCH<sub>2</sub>CH<sub>2</sub>(OCH<sub>2</sub>CH<sub>2</sub>)<sub>4</sub>OCH<sub>2</sub>CH<sub>2</sub>SO<sub>2</sub>CH<sub>2</sub>CH<sub>2</sub>CH<sub>2</sub>(CH<sub>2</sub>)<sub>4</sub>CH<sub>2</sub>CH<sub>2</sub>CH<sub>2</sub>CH<sub>2</sub>SCOCH<sub>3</sub>), 2.28 (s, 3H, CH<sub>3</sub>OCH<sub>2</sub>CH<sub>2</sub>(OCH<sub>2</sub>CH<sub>2</sub>)<sub>4</sub>OCH<sub>2</sub>CH<sub>2</sub>SO<sub>2</sub>CH<sub>2</sub>CH<sub>2</sub>CH<sub>2</sub>(CH<sub>2</sub>)<sub>4</sub>CH<sub>2</sub>CH<sub>2</sub>CH<sub>2</sub>CH<sub>2</sub>SCOCH<sub>3</sub>), 1.85-1.72 (m, 2H, CH<sub>3</sub>OCH<sub>2</sub>CH<sub>2</sub>(OCH<sub>2</sub>CH<sub>2</sub>)<sub>4</sub>OCH<sub>2</sub>CH<sub>2</sub>SO<sub>2</sub>CH<sub>2</sub>CH<sub>2</sub>CH<sub>2</sub>(CH<sub>2</sub>)<sub>4</sub>CH<sub>2</sub>CH<sub>2</sub>CH<sub>2</sub>CH<sub>2</sub>SCOCH<sub>3</sub>), 1.58-1.45 (m, 2H, CH<sub>3</sub>OCH<sub>2</sub>CH<sub>2</sub>(OCH<sub>2</sub>CH<sub>2</sub>)<sub>4</sub>OCH<sub>2</sub>CH<sub>2</sub>SO<sub>2</sub>CH<sub>2</sub>CH<sub>2</sub>CH<sub>2</sub>(CH<sub>2</sub>)<sub>4</sub>CH<sub>2</sub>CH<sub>2</sub>CH<sub>2</sub>CH<sub>2</sub>SCOCH<sub>3</sub>), 1.45-1.15 (m, 14H, CH<sub>3</sub>OCH<sub>2</sub>CH<sub>2</sub>(OCH<sub>2</sub>CH<sub>2</sub>)<sub>4</sub>OCH<sub>2</sub>CH<sub>2</sub>SO<sub>2</sub>CH<sub>2</sub>CH<sub>2</sub>CH<sub>2</sub>(CH<sub>2</sub>)<sub>4</sub>CH<sub>2</sub>CH<sub>2</sub>CH<sub>2</sub>CH<sub>2</sub>SCOCH<sub>3</sub>).

**<sup>13</sup>C-NMR** (100 MHz, CDCl<sub>3</sub>),  $\delta$  [ppm]: 195.86 (CH<sub>3</sub>OCH<sub>2</sub>CH<sub>2</sub>(OCH<sub>2</sub>CH<sub>2</sub>)<sub>4</sub>OCH<sub>2</sub>CH<sub>2</sub>SO<sub>2</sub>CH<sub>2</sub>CH<sub>2</sub>CH<sub>2</sub>(CH<sub>2</sub>)<sub>4</sub>CH<sub>2</sub>CH<sub>2</sub>CH<sub>2</sub>CH<sub>2</sub>SCOCH<sub>3</sub>), 71.80

(CH<sub>3</sub>OCH<sub>2</sub>CH<sub>2</sub>(OCH<sub>2</sub>CH<sub>2</sub>)<sub>4</sub>OCH<sub>2</sub>CH<sub>2</sub>SO<sub>2</sub>CH<sub>2</sub>CH<sub>2</sub>CH<sub>2</sub>(CH<sub>2</sub>)<sub>4</sub>CH<sub>2</sub>CH<sub>2</sub>CH<sub>2</sub>CH<sub>2</sub>SCOCH<sub>3</sub>), 70.46, 70.43, 70.37, 70.18

(CH<sub>3</sub>OCH<sub>2</sub>CH<sub>2</sub>(OCH<sub>2</sub>CH<sub>2</sub>)<sub>4</sub>OCH<sub>2</sub>CH<sub>2</sub>SO<sub>2</sub>CH<sub>2</sub>CH<sub>2</sub>CH<sub>2</sub>(CH<sub>2</sub>)<sub>4</sub>CH<sub>2</sub>CH<sub>2</sub>CH<sub>2</sub>CH<sub>2</sub>SCOCH<sub>3</sub>),

64.69

(CH<sub>3</sub>OCH<sub>2</sub>CH<sub>2</sub>(OCH<sub>2</sub>CH<sub>2</sub>)<sub>4</sub>OCH<sub>2</sub>CH<sub>2</sub>SO<sub>2</sub>CH<sub>2</sub>CH<sub>2</sub>CH<sub>2</sub>(CH<sub>2</sub>)<sub>4</sub>CH<sub>2</sub>CH<sub>2</sub>CH<sub>2</sub>CH<sub>2</sub>SCOCH<sub>3</sub>),

58.88

(CH<sub>3</sub>OCH<sub>2</sub>CH<sub>2</sub>(OCH<sub>2</sub>CH<sub>2</sub>)<sub>4</sub>OCH<sub>2</sub>CH<sub>2</sub>SO<sub>2</sub>CH<sub>2</sub>CH<sub>2</sub>CH<sub>2</sub>(CH<sub>2</sub>)<sub>4</sub>CH<sub>2</sub>CH<sub>2</sub>CH<sub>2</sub>CH<sub>2</sub>SCOCH<sub>3</sub>),

54.68

(CH<sub>3</sub>OCH<sub>2</sub>CH<sub>2</sub>(OCH<sub>2</sub>CH<sub>2</sub>)<sub>4</sub>OCH<sub>2</sub>CH<sub>2</sub>SO<sub>2</sub>CH<sub>2</sub>CH<sub>2</sub>CH<sub>2</sub>(CH<sub>2</sub>)<sub>4</sub>CH<sub>2</sub>CH<sub>2</sub>CH<sub>2</sub>CH<sub>2</sub>SCOCH<sub>3</sub>),

53.12

(CH<sub>3</sub>OCH<sub>2</sub>CH<sub>2</sub>(OCH<sub>2</sub>CH<sub>2</sub>)<sub>4</sub>OCH<sub>2</sub>CH<sub>2</sub>SO<sub>2</sub>CH<sub>2</sub>CH<sub>2</sub>CH<sub>2</sub>(CH<sub>2</sub>)<sub>4</sub>CH<sub>2</sub>CH<sub>2</sub>CH<sub>2</sub>CH<sub>2</sub>SCOCH<sub>3</sub>),

30.50

(CH<sub>3</sub>OCH<sub>2</sub>CH<sub>2</sub>(OCH<sub>2</sub>CH<sub>2</sub>)<sub>4</sub>OCH<sub>2</sub>CH<sub>2</sub>SO<sub>2</sub>CH<sub>2</sub>CH<sub>2</sub>CH<sub>2</sub>(CH<sub>2</sub>)<sub>4</sub>CH<sub>2</sub>CH<sub>2</sub>CH<sub>2</sub>CH<sub>2</sub>SCOCH<sub>3</sub>),

29.34

(CH<sub>3</sub>OCH<sub>2</sub>CH<sub>2</sub>(OCH<sub>2</sub>CH<sub>2</sub>)<sub>4</sub>OCH<sub>2</sub>CH<sub>2</sub>SO<sub>2</sub>CH<sub>2</sub>CH<sub>2</sub>CH<sub>2</sub>(CH<sub>2</sub>)<sub>4</sub>CH<sub>2</sub>CH<sub>2</sub>CH<sub>2</sub>CH<sub>2</sub>SCOCH<sub>3</sub>),

29.28, 29.25, 29.10, 28.97, 28.92

(CH<sub>3</sub>OCH<sub>2</sub>CH<sub>2</sub>(OCH<sub>2</sub>CH<sub>2</sub>)<sub>4</sub>OCH<sub>2</sub>CH<sub>2</sub>SO<sub>2</sub>CH<sub>2</sub>CH<sub>2</sub>CH<sub>2</sub>(CH<sub>2</sub>)<sub>4</sub>CH<sub>2</sub>CH<sub>2</sub>CH<sub>2</sub>CH<sub>2</sub>SCOCH<sub>3</sub>),

28.64

(CH<sub>3</sub>OCH<sub>2</sub>CH<sub>2</sub>(OCH<sub>2</sub>CH<sub>2</sub>)<sub>4</sub>OCH<sub>2</sub>CH<sub>2</sub>SO<sub>2</sub>CH<sub>2</sub>CH<sub>2</sub>CH<sub>2</sub>(CH<sub>2</sub>)<sub>4</sub>CH<sub>2</sub>CH<sub>2</sub>CH<sub>2</sub>CH<sub>2</sub>SCOCH<sub>3</sub>),

28.36

(CH<sub>3</sub>OCH<sub>2</sub>CH<sub>2</sub>(OCH<sub>2</sub>CH<sub>2</sub>)<sub>4</sub>OCH<sub>2</sub>CH<sub>2</sub>SO<sub>2</sub>CH<sub>2</sub>CH<sub>2</sub>CH<sub>2</sub>(CH<sub>2</sub>)<sub>4</sub>CH<sub>2</sub>CH<sub>2</sub>CH<sub>2</sub>CH<sub>2</sub>SCOCH<sub>3</sub>),

21.71

(CH<sub>3</sub>OCH<sub>2</sub>CH<sub>2</sub>(OCH<sub>2</sub>CH<sub>2</sub>)<sub>4</sub>OCH<sub>2</sub>CH<sub>2</sub>SO<sub>2</sub>CH<sub>2</sub>CH<sub>2</sub>CH<sub>2</sub>(CH<sub>2</sub>)<sub>4</sub>CH<sub>2</sub>CH<sub>2</sub>CH<sub>2</sub>CH<sub>2</sub>SCOCH<sub>3</sub>).

**HRMS (ESI, m/z):** [M + Na]<sup>+</sup> calcd for C<sub>26</sub>H<sub>52</sub>NaO<sub>9</sub>S<sub>2</sub>, 595.2950; found 595.2945.

## Deprotection of the thiol groups to yield EG<sub>n</sub>SO<sub>2</sub> (n = 3, 6)

### EG<sub>3</sub>SO<sub>2</sub>; Typical Procedure

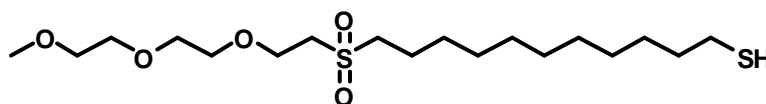

To a solution of MeEG<sub>3</sub>SO<sub>2</sub>UnSAc **7a** (0.35 g, 0.8 mmol) in dry methanol (40 mL) was added dimethylamine (0.2 g, 4.4 mmol). The solution was stirred at room temperature for 24 h followed by acidification with degassed acetic acid. Before the solvent was removed *in vacuo* and the residue extracted with dichloromethane and water. The organic phase was evaporated to dryness to yield **EG<sub>3</sub>SO<sub>2</sub>** (0.37 g, 0.75 mmol, 95 % yield). The resulting product was spectroscopically pure.

**Yield:** 0.37 g (0.75 mmol, 95 %), colourless solid like compound.

**IR**  $\nu_{\max}$  (KBr)/cm<sup>-1</sup> 2919 ( $\nu_{\text{-CH}_3}$ ,  $\nu_{\text{-CH}_2}$ ), 2847 ( $\nu_{\text{-CH}_2}$ ), 1460 ( $\delta_{\text{-CH}_2}$ ,  $\delta_{\text{-CH}_3}$ ), 1403 ( $\nu_{\text{-RSO}_2\text{R-}}$ ), 1383 ( $\nu_{\text{-RSO}_2\text{R-}}$ ), 1321 ( $\nu_{\text{-RSO}_2\text{R-}}$ ), 1285 ( $\nu_{\text{-C-O-C-}}$ ), 1267 ( $\nu_{\text{-C-O-C-}}$ ), 1237 ( $\nu_{\text{-C-O-C-}}$ ), 1194 ( $\nu_{\text{-C-O-C-}}$ ), 1127 ( $\nu_{\text{-C-O-C-}}$ ).

**<sup>1</sup>H-NMR** (500 MHz, CDCl<sub>3</sub>),  $\delta$  [ppm]: 3.88 (t, <sup>3</sup>J<sub>HH</sub> = 5.4 Hz, 2H, CH<sub>3</sub>OCH<sub>2</sub>CH<sub>2</sub>OCH<sub>2</sub>CH<sub>2</sub>OCH<sub>2</sub>CH<sub>2</sub>SO<sub>2</sub>CH<sub>2</sub>CH<sub>2</sub>CH<sub>2</sub>(CH<sub>2</sub>)<sub>4</sub>CH<sub>2</sub>CH<sub>2</sub>CH<sub>2</sub>SH), 3.68-3.56 (m, 6H, CH<sub>3</sub>OCH<sub>2</sub>CH<sub>2</sub>OCH<sub>2</sub>CH<sub>2</sub>OCH<sub>2</sub>CH<sub>2</sub>SO<sub>2</sub>CH<sub>2</sub>CH<sub>2</sub>CH<sub>2</sub>(CH<sub>2</sub>)<sub>4</sub>CH<sub>2</sub>CH<sub>2</sub>CH<sub>2</sub>SH), 3.55-3.44 (m, 2H, CH<sub>3</sub>OCH<sub>2</sub>CH<sub>2</sub>OCH<sub>2</sub>CH<sub>2</sub>OCH<sub>2</sub>CH<sub>2</sub>SO<sub>2</sub>CH<sub>2</sub>CH<sub>2</sub>CH<sub>2</sub>(CH<sub>2</sub>)<sub>4</sub>CH<sub>2</sub>CH<sub>2</sub>CH<sub>2</sub>SH), 3.35 (s, 3H, CH<sub>3</sub>OCH<sub>2</sub>CH<sub>2</sub>OCH<sub>2</sub>CH<sub>2</sub>OCH<sub>2</sub>CH<sub>2</sub>SO<sub>2</sub>CH<sub>2</sub>CH<sub>2</sub>CH<sub>2</sub>(CH<sub>2</sub>)<sub>4</sub>CH<sub>2</sub>CH<sub>2</sub>CH<sub>2</sub>SH), 3.16 (t, <sup>3</sup>J<sub>HH</sub> = 5.4 Hz, 2H, CH<sub>3</sub>OCH<sub>2</sub>CH<sub>2</sub>OCH<sub>2</sub>CH<sub>2</sub>OCH<sub>2</sub>CH<sub>2</sub>SO<sub>2</sub>CH<sub>2</sub>CH<sub>2</sub>CH<sub>2</sub>(CH<sub>2</sub>)<sub>4</sub>CH<sub>2</sub>CH<sub>2</sub>CH<sub>2</sub>SH), 3.06 (t, <sup>3</sup>J<sub>HH</sub> = 8.0 Hz, 2H, CH<sub>3</sub>OCH<sub>2</sub>CH<sub>2</sub>OCH<sub>2</sub>CH<sub>2</sub>OCH<sub>2</sub>CH<sub>2</sub>SO<sub>2</sub>CH<sub>2</sub>CH<sub>2</sub>CH<sub>2</sub>(CH<sub>2</sub>)<sub>4</sub>CH<sub>2</sub>CH<sub>2</sub>CH<sub>2</sub>SH),

2.49 (q,  $^3J_{HH} = 7.4$  Hz, 2H,  
CH<sub>3</sub>OCH<sub>2</sub>CH<sub>2</sub>OCH<sub>2</sub>CH<sub>2</sub>OCH<sub>2</sub>CH<sub>2</sub>SO<sub>2</sub>CH<sub>2</sub>CH<sub>2</sub>CH<sub>2</sub>(CH<sub>2</sub>)<sub>4</sub>CH<sub>2</sub>CH<sub>2</sub>CH<sub>2</sub>CH<sub>2</sub>SH),  
1.87-1.72 (m, 2H,  
CH<sub>3</sub>OCH<sub>2</sub>CH<sub>2</sub>OCH<sub>2</sub>CH<sub>2</sub>OCH<sub>2</sub>CH<sub>2</sub>SO<sub>2</sub>CH<sub>2</sub>CH<sub>2</sub>CH<sub>2</sub>(CH<sub>2</sub>)<sub>4</sub>CH<sub>2</sub>CH<sub>2</sub>CH<sub>2</sub>CH<sub>2</sub>SH),  
1.72-1.61 (m, 2H,  
CH<sub>3</sub>OCH<sub>2</sub>CH<sub>2</sub>OCH<sub>2</sub>CH<sub>2</sub>OCH<sub>2</sub>CH<sub>2</sub>SO<sub>2</sub>CH<sub>2</sub>CH<sub>2</sub>CH<sub>2</sub>(CH<sub>2</sub>)<sub>4</sub>CH<sub>2</sub>CH<sub>2</sub>CH<sub>2</sub>CH<sub>2</sub>SH),  
1.61-1.49 (m, 2H,  
CH<sub>3</sub>OCH<sub>2</sub>CH<sub>2</sub>OCH<sub>2</sub>CH<sub>2</sub>OCH<sub>2</sub>CH<sub>2</sub>SO<sub>2</sub>CH<sub>2</sub>CH<sub>2</sub>CH<sub>2</sub>(CH<sub>2</sub>)<sub>4</sub>CH<sub>2</sub>CH<sub>2</sub>CH<sub>2</sub>CH<sub>2</sub>SH),  
1.47-1.15 (m, 13H,  
CH<sub>3</sub>OCH<sub>2</sub>CH<sub>2</sub>OCH<sub>2</sub>CH<sub>2</sub>OCH<sub>2</sub>CH<sub>2</sub>SO<sub>2</sub>CH<sub>2</sub>CH<sub>2</sub>CH<sub>2</sub>(CH<sub>2</sub>)<sub>4</sub>CH<sub>2</sub>CH<sub>2</sub>CH<sub>2</sub>CH<sub>2</sub>SH).  
Traces of the respective disulfide could be detected at 2.65 ppm (t,  $^3J_{HH} = 7.3$  Hz, 2H,  
CH<sub>2</sub>CH<sub>2</sub>S<sub>2</sub>).

<sup>13</sup>C-NMR (125 MHz, CDCl<sub>3</sub>), δ [ppm]:

71.85 (CH<sub>3</sub>OCH<sub>2</sub>CH<sub>2</sub>OCH<sub>2</sub>CH<sub>2</sub>OCH<sub>2</sub>CH<sub>2</sub>SO<sub>2</sub>CH<sub>2</sub>CH<sub>2</sub>CH<sub>2</sub>(CH<sub>2</sub>)<sub>4</sub>CH<sub>2</sub>CH<sub>2</sub>CH<sub>2</sub>CH<sub>2</sub>SH),  
70.50, 70.44, 70.25  
(CH<sub>3</sub>OCH<sub>2</sub>CH<sub>2</sub>OCH<sub>2</sub>CH<sub>2</sub>OCH<sub>2</sub>CH<sub>2</sub>SO<sub>2</sub>CH<sub>2</sub>CH<sub>2</sub>CH<sub>2</sub>(CH<sub>2</sub>)<sub>4</sub>CH<sub>2</sub>CH<sub>2</sub>CH<sub>2</sub>CH<sub>2</sub>SH),  
64.75 (CH<sub>3</sub>OCH<sub>2</sub>CH<sub>2</sub>OCH<sub>2</sub>CH<sub>2</sub>OCH<sub>2</sub>CH<sub>2</sub>SO<sub>2</sub>CH<sub>2</sub>CH<sub>2</sub>CH<sub>2</sub>(CH<sub>2</sub>)<sub>4</sub>CH<sub>2</sub>CH<sub>2</sub>CH<sub>2</sub>CH<sub>2</sub>SH),  
58.95 (CH<sub>3</sub>OCH<sub>2</sub>CH<sub>2</sub>OCH<sub>2</sub>CH<sub>2</sub>OCH<sub>2</sub>CH<sub>2</sub>SO<sub>2</sub>CH<sub>2</sub>CH<sub>2</sub>CH<sub>2</sub>(CH<sub>2</sub>)<sub>4</sub>CH<sub>2</sub>CH<sub>2</sub>CH<sub>2</sub>CH<sub>2</sub>SH),  
54.75 (CH<sub>3</sub>OCH<sub>2</sub>CH<sub>2</sub>OCH<sub>2</sub>CH<sub>2</sub>OCH<sub>2</sub>CH<sub>2</sub>SO<sub>2</sub>CH<sub>2</sub>CH<sub>2</sub>CH<sub>2</sub>(CH<sub>2</sub>)<sub>4</sub>CH<sub>2</sub>CH<sub>2</sub>CH<sub>2</sub>CH<sub>2</sub>SH),  
53.22 (CH<sub>3</sub>OCH<sub>2</sub>CH<sub>2</sub>OCH<sub>2</sub>CH<sub>2</sub>OCH<sub>2</sub>CH<sub>2</sub>SO<sub>2</sub>CH<sub>2</sub>CH<sub>2</sub>CH<sub>2</sub>(CH<sub>2</sub>)<sub>4</sub>CH<sub>2</sub>CH<sub>2</sub>CH<sub>2</sub>CH<sub>2</sub>SH),  
33.93 (CH<sub>3</sub>OCH<sub>2</sub>CH<sub>2</sub>OCH<sub>2</sub>CH<sub>2</sub>OCH<sub>2</sub>CH<sub>2</sub>SO<sub>2</sub>CH<sub>2</sub>CH<sub>2</sub>CH<sub>2</sub>(CH<sub>2</sub>)<sub>4</sub>CH<sub>2</sub>CH<sub>2</sub>CH<sub>2</sub>CH<sub>2</sub>SH),  
29.34, 29.16, 29.12, 29.03, 28.94  
(CH<sub>3</sub>OCH<sub>2</sub>CH<sub>2</sub>OCH<sub>2</sub>CH<sub>2</sub>OCH<sub>2</sub>CH<sub>2</sub>SO<sub>2</sub>CH<sub>2</sub>CH<sub>2</sub>CH<sub>2</sub>(CH<sub>2</sub>)<sub>4</sub>CH<sub>2</sub>CH<sub>2</sub>CH<sub>2</sub>CH<sub>2</sub>SH),  
28.42 (CH<sub>3</sub>OCH<sub>2</sub>CH<sub>2</sub>OCH<sub>2</sub>CH<sub>2</sub>OCH<sub>2</sub>CH<sub>2</sub>SO<sub>2</sub>CH<sub>2</sub>CH<sub>2</sub>CH<sub>2</sub>(CH<sub>2</sub>)<sub>4</sub>CH<sub>2</sub>CH<sub>2</sub>CH<sub>2</sub>CH<sub>2</sub>SH),  
28.25 (CH<sub>3</sub>OCH<sub>2</sub>CH<sub>2</sub>OCH<sub>2</sub>CH<sub>2</sub>OCH<sub>2</sub>CH<sub>2</sub>SO<sub>2</sub>CH<sub>2</sub>CH<sub>2</sub>CH<sub>2</sub>(CH<sub>2</sub>)<sub>4</sub>CH<sub>2</sub>CH<sub>2</sub>CH<sub>2</sub>CH<sub>2</sub>SH),  
24.53 (CH<sub>3</sub>OCH<sub>2</sub>CH<sub>2</sub>OCH<sub>2</sub>CH<sub>2</sub>OCH<sub>2</sub>CH<sub>2</sub>SO<sub>2</sub>CH<sub>2</sub>CH<sub>2</sub>CH<sub>2</sub>(CH<sub>2</sub>)<sub>4</sub>CH<sub>2</sub>CH<sub>2</sub>CH<sub>2</sub>CH<sub>2</sub>SH),  
21.77 (CH<sub>3</sub>OCH<sub>2</sub>CH<sub>2</sub>OCH<sub>2</sub>CH<sub>2</sub>OCH<sub>2</sub>CH<sub>2</sub>SO<sub>2</sub>CH<sub>2</sub>CH<sub>2</sub>CH<sub>2</sub>(CH<sub>2</sub>)<sub>4</sub>CH<sub>2</sub>CH<sub>2</sub>CH<sub>2</sub>CH<sub>2</sub>SH).  
[39.07 (CH<sub>2</sub>CH<sub>2</sub>CH<sub>2</sub>S<sub>2</sub>)].

**HRMS (ESI, m/z):** [M + Na]<sup>+</sup> calcd for C<sub>18</sub>H<sub>38</sub>NaO<sub>5</sub>S<sub>2</sub>, 421.2058; found 421.2053.

## EG6SO2

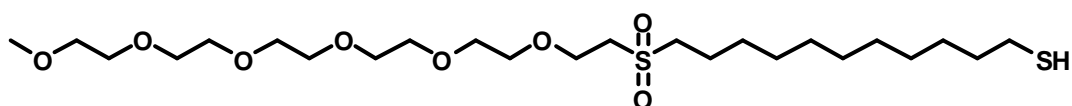

MeEG<sub>6</sub>SO<sub>2</sub>UnSAc **7b** (0.5 g, 0.9 mmol) was converted to the thiol analogous to **7a** using dimethylamine (0.2 g, 4.4 mmol). The crude product was purified by chromatography on silica gel using ethylacetate/ ethanol (1% to 20%) as eluent to yield EG6SO2 as a colourless oil (0.37 g, 0.7 mmol, 78 % yield).

**Yield:** 0.37 g (0.7 mmol, 78 %), colourless oil.

**IR v<sub>max</sub> (KBr)/cm<sup>-1</sup>** 2925 (ν<sub>(-CH<sub>3</sub>), ν<sub>(-CH<sub>2</sub>)</sub>), 2856 (ν<sub>(-CH<sub>2</sub>)</sub>), 1463 (δ<sub>(-CH<sub>2</sub>)</sub>, δ<sub>(-CH<sub>3</sub>)</sub>), 1351 (ν<sub>(-RSO<sub>2</sub>R-)</sub>), 1317 (ν<sub>(-RSO<sub>2</sub>R-)</sub>), 1288 (ν<sub>(-C-O-C-)</sub>), 1251 (ν<sub>(-C-O-C-)</sub>), 1199 (ν<sub>(-C-O-C-)</sub>), 1118 (ν<sub>(-C-O-C-)</sub>).</sub>

**<sup>1</sup>H-NMR** (500 MHz, CDCl<sub>3</sub>), δ [ppm]: 3.90 (t,  $^3J_{HH} = 5.5$  Hz, 2H,  
CH<sub>3</sub>OCH<sub>2</sub>CH<sub>2</sub>(OCH<sub>2</sub>CH<sub>2</sub>)<sub>4</sub>OCH<sub>2</sub>CH<sub>2</sub>SO<sub>2</sub>CH<sub>2</sub>CH<sub>2</sub>CH<sub>2</sub>(CH<sub>2</sub>)<sub>4</sub>CH<sub>2</sub>CH<sub>2</sub>CH<sub>2</sub>CH<sub>2</sub>SH),  
3.68-3.58 (m, 18H,  
CH<sub>3</sub>OCH<sub>2</sub>CH<sub>2</sub>(OCH<sub>2</sub>CH<sub>2</sub>)<sub>4</sub>OCH<sub>2</sub>CH<sub>2</sub>SO<sub>2</sub>CH<sub>2</sub>CH<sub>2</sub>CH<sub>2</sub>(CH<sub>2</sub>)<sub>4</sub>CH<sub>2</sub>CH<sub>2</sub>CH<sub>2</sub>CH<sub>2</sub>SH),  
3.57-3.51 (m, 2H,  
CH<sub>3</sub>OCH<sub>2</sub>CH<sub>2</sub>(OCH<sub>2</sub>CH<sub>2</sub>)<sub>4</sub>OCH<sub>2</sub>CH<sub>2</sub>SO<sub>2</sub>CH<sub>2</sub>CH<sub>2</sub>CH<sub>2</sub>(CH<sub>2</sub>)<sub>4</sub>CH<sub>2</sub>CH<sub>2</sub>CH<sub>2</sub>CH<sub>2</sub>SH),  
3.37 (s, 3H,  
CH<sub>3</sub>OCH<sub>2</sub>CH<sub>2</sub>(OCH<sub>2</sub>CH<sub>2</sub>)<sub>4</sub>OCH<sub>2</sub>CH<sub>2</sub>SO<sub>2</sub>CH<sub>2</sub>CH<sub>2</sub>CH<sub>2</sub>(CH<sub>2</sub>)<sub>4</sub>CH<sub>2</sub>CH<sub>2</sub>CH<sub>2</sub>CH<sub>2</sub>SH),

3.18 (t,  $^3J_{HH} = 5.4$  Hz, 2H,  
CH<sub>3</sub>OCH<sub>2</sub>CH<sub>2</sub>(OCH<sub>2</sub>CH<sub>2</sub>)<sub>4</sub>OCH<sub>2</sub>CH<sub>2</sub>SO<sub>2</sub>CH<sub>2</sub>CH<sub>2</sub>CH<sub>2</sub>(CH<sub>2</sub>)<sub>4</sub>CH<sub>2</sub>CH<sub>2</sub>CH<sub>2</sub>CH<sub>2</sub>SH),  
3.08 (t,  $^3J_{HH} = 8.0$  Hz, 2H,  
CH<sub>3</sub>OCH<sub>2</sub>CH<sub>2</sub>(OCH<sub>2</sub>CH<sub>2</sub>)<sub>4</sub>OCH<sub>2</sub>CH<sub>2</sub>SO<sub>2</sub>CH<sub>2</sub>CH<sub>2</sub>CH<sub>2</sub>(CH<sub>2</sub>)<sub>4</sub>CH<sub>2</sub>CH<sub>2</sub>CH<sub>2</sub>CH<sub>2</sub>SH),  
2.51 (q,  $^3J_{HH} = 7.4$  Hz, 2H,  
CH<sub>3</sub>OCH<sub>2</sub>CH<sub>2</sub>(OCH<sub>2</sub>CH<sub>2</sub>)<sub>4</sub>OCH<sub>2</sub>CH<sub>2</sub>SO<sub>2</sub>CH<sub>2</sub>CH<sub>2</sub>CH<sub>2</sub>(CH<sub>2</sub>)<sub>4</sub>CH<sub>2</sub>CH<sub>2</sub>CH<sub>2</sub>CH<sub>2</sub>SH),  
1.88-1.78 (m, 2H,  
CH<sub>3</sub>OCH<sub>2</sub>CH<sub>2</sub>(OCH<sub>2</sub>CH<sub>2</sub>)<sub>4</sub>OCH<sub>2</sub>CH<sub>2</sub>SO<sub>2</sub>CH<sub>2</sub>CH<sub>2</sub>CH<sub>2</sub>(CH<sub>2</sub>)<sub>4</sub>CH<sub>2</sub>CH<sub>2</sub>CH<sub>2</sub>CH<sub>2</sub>SH),  
1.65-1.53 (m, 2H,  
CH<sub>3</sub>OCH<sub>2</sub>CH<sub>2</sub>(OCH<sub>2</sub>CH<sub>2</sub>)<sub>4</sub>OCH<sub>2</sub>CH<sub>2</sub>SO<sub>2</sub>CH<sub>2</sub>CH<sub>2</sub>CH<sub>2</sub>(CH<sub>2</sub>)<sub>4</sub>CH<sub>2</sub>CH<sub>2</sub>CH<sub>2</sub>CH<sub>2</sub>SH),  
1.46-1.18 (m, 15H,  
CH<sub>3</sub>OCH<sub>2</sub>CH<sub>2</sub>(OCH<sub>2</sub>CH<sub>2</sub>)<sub>4</sub>OCH<sub>2</sub>CH<sub>2</sub>SO<sub>2</sub>CH<sub>2</sub>CH<sub>2</sub>CH<sub>2</sub>(CH<sub>2</sub>)<sub>4</sub>CH<sub>2</sub>CH<sub>2</sub>CH<sub>2</sub>CH<sub>2</sub>SH).  
<sup>13</sup>C-NMR (125 MHz, CDCl<sub>3</sub>), δ [ppm]:  
71.94 (CH<sub>3</sub>OCH<sub>2</sub>CH<sub>2</sub>(OCH<sub>2</sub>CH<sub>2</sub>)<sub>4</sub>OCH<sub>2</sub>CH<sub>2</sub>SO<sub>2</sub>CH<sub>2</sub>CH<sub>2</sub>CH<sub>2</sub>(CH<sub>2</sub>)<sub>4</sub>CH<sub>2</sub>CH<sub>2</sub>CH<sub>2</sub>CH<sub>2</sub>SH),  
70.61, 70.57, 70.52, 70.31  
(CH<sub>3</sub>OCH<sub>2</sub>CH<sub>2</sub>(OCH<sub>2</sub>CH<sub>2</sub>)<sub>4</sub>OCH<sub>2</sub>CH<sub>2</sub>SO<sub>2</sub>CH<sub>2</sub>CH<sub>2</sub>CH<sub>2</sub>(CH<sub>2</sub>)<sub>4</sub>CH<sub>2</sub>CH<sub>2</sub>CH<sub>2</sub>CH<sub>2</sub>SH),  
64.82 (CH<sub>3</sub>OCH<sub>2</sub>CH<sub>2</sub>(OCH<sub>2</sub>CH<sub>2</sub>)<sub>4</sub>OCH<sub>2</sub>CH<sub>2</sub>SO<sub>2</sub>CH<sub>2</sub>CH<sub>2</sub>CH<sub>2</sub>(CH<sub>2</sub>)<sub>4</sub>CH<sub>2</sub>CH<sub>2</sub>CH<sub>2</sub>CH<sub>2</sub>SH),  
59.01 (CH<sub>3</sub>OCH<sub>2</sub>CH<sub>2</sub>(OCH<sub>2</sub>CH<sub>2</sub>)<sub>4</sub>OCH<sub>2</sub>CH<sub>2</sub>SO<sub>2</sub>CH<sub>2</sub>CH<sub>2</sub>CH<sub>2</sub>(CH<sub>2</sub>)<sub>4</sub>CH<sub>2</sub>CH<sub>2</sub>CH<sub>2</sub>CH<sub>2</sub>SH),  
54.82 (CH<sub>3</sub>OCH<sub>2</sub>CH<sub>2</sub>(OCH<sub>2</sub>CH<sub>2</sub>)<sub>4</sub>OCH<sub>2</sub>CH<sub>2</sub>SO<sub>2</sub>CH<sub>2</sub>CH<sub>2</sub>CH<sub>2</sub>(CH<sub>2</sub>)<sub>4</sub>CH<sub>2</sub>CH<sub>2</sub>CH<sub>2</sub>CH<sub>2</sub>SH),  
53.29 (CH<sub>3</sub>OCH<sub>2</sub>CH<sub>2</sub>(OCH<sub>2</sub>CH<sub>2</sub>)<sub>4</sub>OCH<sub>2</sub>CH<sub>2</sub>SO<sub>2</sub>CH<sub>2</sub>CH<sub>2</sub>CH<sub>2</sub>(CH<sub>2</sub>)<sub>4</sub>CH<sub>2</sub>CH<sub>2</sub>CH<sub>2</sub>CH<sub>2</sub>SH),  
34.00 (CH<sub>3</sub>OCH<sub>2</sub>CH<sub>2</sub>(OCH<sub>2</sub>CH<sub>2</sub>)<sub>4</sub>OCH<sub>2</sub>CH<sub>2</sub>SO<sub>2</sub>CH<sub>2</sub>CH<sub>2</sub>CH<sub>2</sub>(CH<sub>2</sub>)<sub>4</sub>CH<sub>2</sub>CH<sub>2</sub>CH<sub>2</sub>CH<sub>2</sub>SH),  
29.43, 29.24, 29.10, 29.02, 28.50  
(CH<sub>3</sub>OCH<sub>2</sub>CH<sub>2</sub>(OCH<sub>2</sub>CH<sub>2</sub>)<sub>4</sub>OCH<sub>2</sub>CH<sub>2</sub>SO<sub>2</sub>CH<sub>2</sub>CH<sub>2</sub>CH<sub>2</sub>(CH<sub>2</sub>)<sub>4</sub>CH<sub>2</sub>CH<sub>2</sub>CH<sub>2</sub>CH<sub>2</sub>SH),  
28.33 (CH<sub>3</sub>OCH<sub>2</sub>CH<sub>2</sub>(OCH<sub>2</sub>CH<sub>2</sub>)<sub>4</sub>OCH<sub>2</sub>CH<sub>2</sub>SO<sub>2</sub>CH<sub>2</sub>CH<sub>2</sub>CH<sub>2</sub>(CH<sub>2</sub>)<sub>4</sub>CH<sub>2</sub>CH<sub>2</sub>CH<sub>2</sub>CH<sub>2</sub>SH),  
24.61 (CH<sub>3</sub>OCH<sub>2</sub>CH<sub>2</sub>(OCH<sub>2</sub>CH<sub>2</sub>)<sub>4</sub>OCH<sub>2</sub>CH<sub>2</sub>SO<sub>2</sub>CH<sub>2</sub>CH<sub>2</sub>CH<sub>2</sub>(CH<sub>2</sub>)<sub>4</sub>CH<sub>2</sub>CH<sub>2</sub>CH<sub>2</sub>CH<sub>2</sub>SH),  
21.83 (CH<sub>3</sub>OCH<sub>2</sub>CH<sub>2</sub>(OCH<sub>2</sub>CH<sub>2</sub>)<sub>4</sub>OCH<sub>2</sub>CH<sub>2</sub>SO<sub>2</sub>CH<sub>2</sub>CH<sub>2</sub>CH<sub>2</sub>(CH<sub>2</sub>)<sub>4</sub>CH<sub>2</sub>CH<sub>2</sub>CH<sub>2</sub>CH<sub>2</sub>SH).  
**HRMS (ESI, m/z):** [M + Na]<sup>+</sup> calcd for C<sub>24</sub>H<sub>50</sub>NaO<sub>8</sub>S<sub>2</sub>, 553.2845; found 553.2839.

#### Alternative synthesis of MeEG<sub>3</sub>SH 4a via MeEG<sub>3</sub>Cl 9a

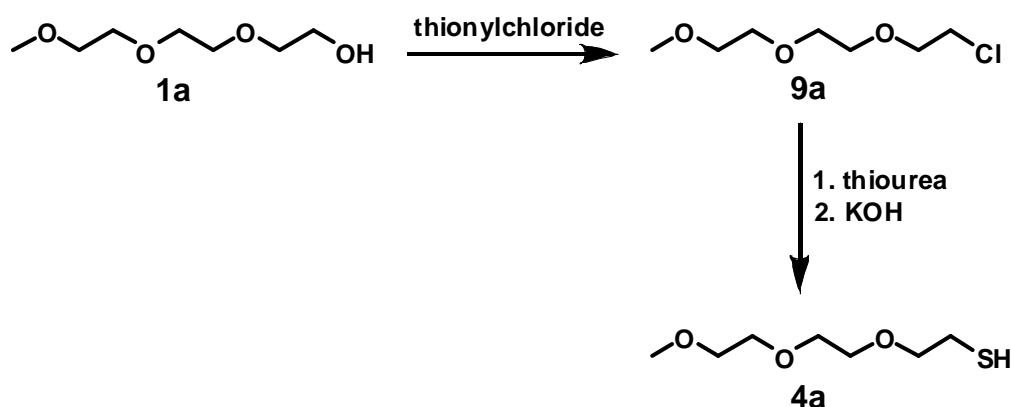

MeEG<sub>3</sub>Cl 9a<sup>1,8-11</sup>

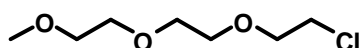

MeEG<sub>3</sub>OH 1a (20.08 g, 122 mmol) was added to thionylchloride (14.95 g, 126 mmol) over a period of 2 h while maintaining a temperature of 0 °C. The mixture was stirred at RT for 24 h and then transferred dropwise into a preheated flask (110 °C) within 2 h resulting a vivid gas

evolution (mainly SO<sub>2</sub>). Heating was continued at 120 °C until the gas production was over and the product was purified by distillation to yield 11.6 g (64 mmol, 52 %).

**Yield:** 11.6 g (64 mmol, 52 %), colourless liquid.

**<sup>1</sup>H-NMR** (300 MHz, CDCl<sub>3</sub>), δ [ppm]: 3.82-3.72 (m, 2H, CH<sub>3</sub>OCH<sub>2</sub>CH<sub>2</sub>OCH<sub>2</sub>CH<sub>2</sub>OCH<sub>2</sub>CH<sub>2</sub>Cl), 3.72-3.60 (m, 8H, CH<sub>3</sub>OCH<sub>2</sub>CH<sub>2</sub>OCH<sub>2</sub>CH<sub>2</sub>OCH<sub>2</sub>CH<sub>2</sub>Cl), 3.60-3.50 (m, 2H, CH<sub>3</sub>OCH<sub>2</sub>CH<sub>2</sub>OCH<sub>2</sub>CH<sub>2</sub>OCH<sub>2</sub>CH<sub>2</sub>Cl), 3.38 (s, 3H, CH<sub>3</sub>OCH<sub>2</sub>CH<sub>2</sub>(OCH<sub>2</sub>CH<sub>2</sub>)<sub>4</sub>OCH<sub>2</sub>CH<sub>2</sub>Cl).

MeEG<sub>3</sub>SH **4a**<sup>12-15</sup>

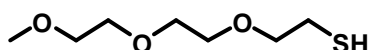

A solution of MeEG<sub>3</sub>Cl **9a** (11.6 g, 64 mmol) and thiourea (5.9 g, 77.5 mmol) in dimethylformamide (100 mL) was heated to 90 °C for 3 days. The solvent was removed *in vacuo* and the residue was taken up in dry ethanol (120 mL). Then a solution of KOH (18.7 g, 333 mmol) in dry ethanol (80 mL) was added and the mixture was heated to 100 °C for 3 days. The mixture was acidified by the addition of degassed hydrochloric acid (25 %, 40 mL). The solvent was removed *in vacuo* and the residue portioned between dichloromethane and water. The organic phase was concentrated under reduced pressure to yield a residue of 7.3 g that was purified by distillation to yield MeEG<sub>3</sub>SH **4a** (2.2 g, 12.2 mmol, 19 %).

**Yield:** 2.2 g (12.2 mmol, 19%), colourless liquid.

Analytical data are identical to the ones mentioned above.

#### References

- [1] M. T. Stone, J. S. Moore *Org. Lett.*, 2004, **6**, 469.
- [2] T. Nabeshima, N. Tsukada, K. Nishijima, H. Ohshiro, Y. Yano, *J. Org. Chem.*, 1996, **61**, 4342.
- [3] R. J. Palmer, C. J. M. Stirling, *J. Am. Chem. Soc.*, 1980, **102**, 7888.
- [4] Y. Kanbe, M.-H. Kim, M. Nishimoto, Y. Ohtake, N. Kato, T. Tsunenari, K. Taniguchi, I. Ohizumi, S. Kaiho, K. Morikawa, J.-C. Jo, H.-S. Lim, H.-Y. Kim, *Bioorganic & Medicinal Chemistry*, 2006, **14**, 4803.
- [5] H.-G. Hong, W. I. Park, *Langmuir*, 2001, **17**, 2485.
- [6] T. Nabeshima, K. Nishijima, N. Tsukada, H. Furusawa, T. Hosoya, Y. Yano, *J. Chem. Soc., Chem. Commun.*, 1992, **15**, 1092.
- [7] M. Kleinert, T. Winkler, A. Terfort, T. K. Lindhorst, *Org. Biomol. Chem.*, 2008, **6**, 2118.
- [8] C. J. Pedersen, *J. Am. Chem. Soc.*, 1967, **89**, 7017.
- [9] C. J. Hawker, P. I. M. Saville, J. W. White, *J. Org. Chem.*, 1994, **59**, 3503.
- [10] V. Gudipati, D. P. Curran, C. S. Wilcox, *J. Org. Chem.*, 2006, **71**, 3599.
- [11] B. Loubinoux, J.L. Colin, V. Thomas, *Eur. J. Med. Chem.*, 1991, **26**, 461.
- [12] E. Livni, M. A. Davis, V. D. Warner, *J. Med. Chem.*, 1979, **22**, 580.
- [13] G. Kada, C. K. Riener, H. J. Gruber, *Tetrahedron Letters*, 2001, **42**, 2677.
- [14] C. M. Jung, W. Kraus, P. Leibnitz, H.-J. Pietzsch, J. Kropp, H. Spies, *Eur. J. Inorg. Chem.*, 2002, **5**, 1219.
- [15] B. J. Tarasevich, C. C. Chusuei, D. L. Allara, *J. Phys. Chem. B*, 2003, **107**, 10367.
